# Supplementary material for: The Size Distributions of Faults and Earthquakes: Implications for Orogen-Internal Seismogenic Deformation
Source: Copernicus journal article supplement (doi:10.5194/egusphere-2024-2975), 2024-09-26
Supplement: Supplementary file 1 [file egusphere-2024-2975-supplement.pdf]

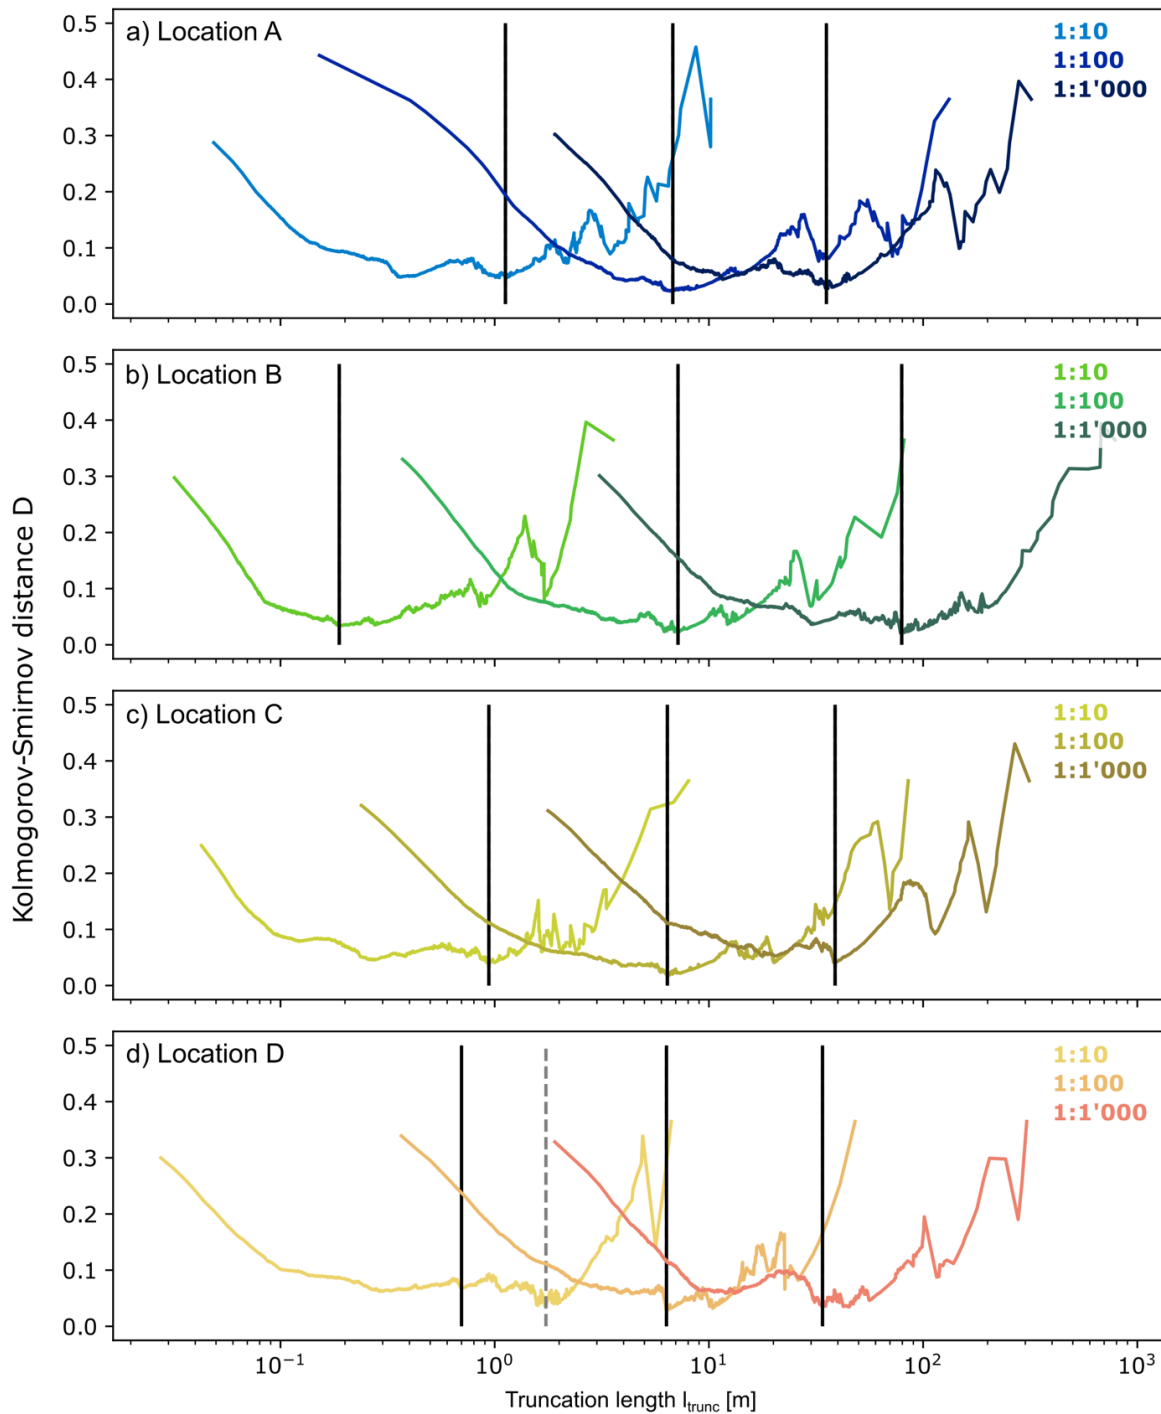

**Figure S1: Kolmogorov-Smirnov plots of the individual fault trace maps from the four different locations to define the optimal truncation length  $l_{\text{trunc}}$ , indicated by the solid vertical lines. Note that for the 1:10 scale fault trace map at location D, we manually adjusted  $l_{\text{trunc}}$  due to the non-detected global minimum (dashed vertical line).**

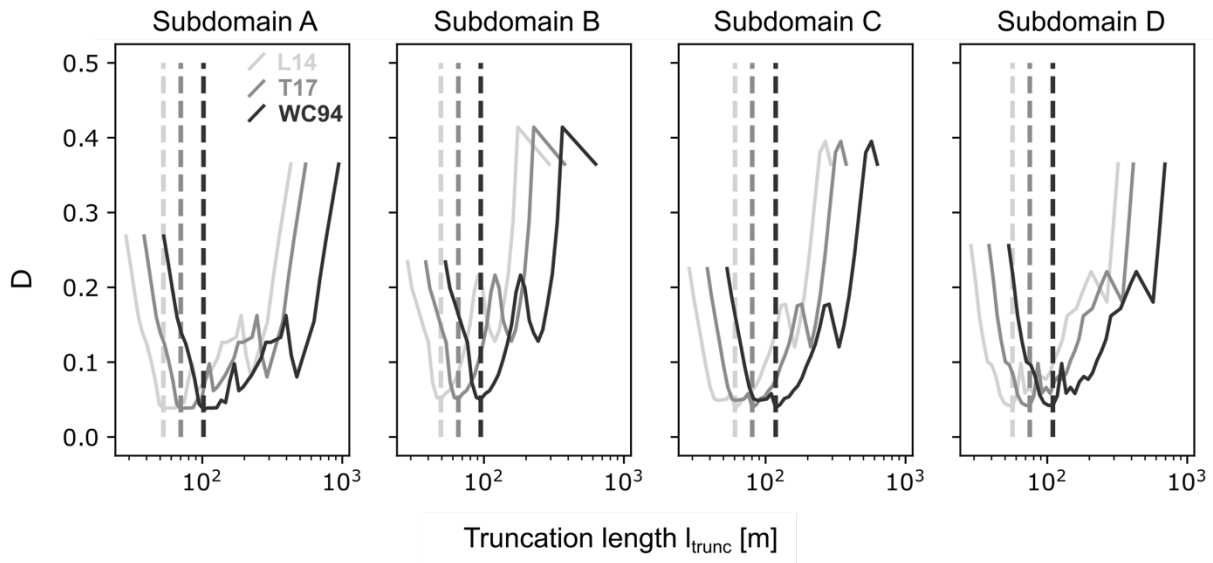

5

**Figure S2:** Kolmogorov-Smirnov plots of the earthquake rupture size distributions from the four subdomains A-D to define the optimal truncation length  $l_{\text{trunc}}$ , indicated by the dashed vertical lines. The different scales of grey denote the used empirical  $M_w - A_R$  scaling laws from Leonard (2014) (L14), Thingbaijam et al. (2017) (T17), and Wells and Coppersmith (1994) (WC94).
