# Supplementary material for: The Size Distributions of Faults and Earthquakes: Implications for Orogen-Internal Seismogenic Deformation
Source: Copernicus journal article supplement (doi:10.5194/egusphere-2024-2975), 2024-09-26
Supplement: Supplementary file [file egusphere-2024-2975-RC1-supplement.pdf]

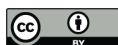

# The Size Distributions of Faults and Earthquakes: Implications for Orogen-Internal Seismogenic Deformation

Sandro Truttmann<sup>1</sup>, Tobias Diehl<sup>2</sup>, Marco Herwegh<sup>1</sup>, Stefan Wiemer<sup>2</sup>

<sup>1</sup>Institute of Geological Sciences, University of Bern, Bern, 3012, Switzerland

5 <sup>2</sup>Swiss Seismological Service, ETH Zürich, Zürich, 8092, Switzerland

*Correspondence to:* Sandro Truttmann ([sandro.truttmann@gmail.com](mailto:sandro.truttmann@gmail.com))

**Abstract.** Pre-existing geological discontinuities such as faults represent structural and mechanical discontinuities in rocks which influence earthquake processes. As earthquakes occur in the subsurface, seismogenic reactivation of pre-existing fault networks is difficult to investigate in natural settings. However, it is well-known that there exists a physical link between both  
10 faults and earthquakes since an earthquake's magnitude is related to the ruptured fault area and therefore fault length. Furthermore, faults and earthquakes exhibit similar statistical properties, as their size distributions follow power laws. In this study, we exploit the relation between the size distributions of faults and earthquakes to decipher the seismic deformation processes within the exhumation-related orogen-internal setting of the Southwestern Swiss Alps, which due to its well-monitored seismic activity and the excellent outcrop conditions provides an ideal study site. Characterizing the size  
15 distribution of exhumed fault networks from different tectonic units based on multi-scale drone-based mapping, we find that power law exponents of 3D fault networks generally range between 3 and 3.6. Comparing these values with the depth-dependent exponents of estimated earthquake rupture lengths, we observe significantly larger values of 5 to 8 for earthquake ruptures at shallow depths (< 3 km below sea level (BSL)). At intermediate crustal depths (~3 to 9 km BSL), the power law exponents of faults and earthquakes appear to be similar. These findings imply depth-dependent differences in the seismogenic  
20 reactivation of pre-existing faults in the study region: while partial rupturing is the prevailing deformation mechanism at shallow depths, faults are more likely to rupture along their entire length at intermediate crustal depths. Therefore, the present-day near surface differential stresses are likely insufficient to rupture entire pre-existing faults seismogenically. Our findings have direct implications for seismic hazard considerations, as earthquakes that rupture along entire faults appear to become less likely with decreasing depth.

25

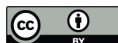

## 1 Introduction

Within the Earth's crust, the occurrence of earthquakes is commonly attributed to the reactivation of pre-existing geological discontinuities, commonly referred to as faults. Nevertheless, in regions characterized by extensive faulting and scattered seismic activity, like in collisional orogens such as the Alps, the task of assigning earthquakes to specific fault segments becomes notably complex. This challenge limits our ability to decipher the current deformation processes and discern the significance of such intricate pre-existing fault networks in influencing the underlying seismic events.

Despite their complexity, faults in nature often appear qualitatively self-similar at different scales. This qualitative self-similarity can be quantified by power law distributions, inherently implying scale invariance and thus absence of a characteristic length scale, which is different to any other statistical distribution. Previous studies have shown that a power law is best suited for describing the size (or length) distribution of natural fault traces (Odling, 1997; Bonnet et al., 2001; Torabi and Berg, 2011; Yielding et al., 1996; Davy et al., 2010; Scholz, 2019), even if other types of distributions have been proposed (Cowie et al., 1995, 1993; Ackermann et al., 2001; Nicol et al., 1996). A power law distribution defines the number  $n$  of features of a given length  $l$  as:

$$n(l) = c l^{-\alpha} \quad (1)$$

where  $\alpha$  represents the power law exponent (i.e., the slope of the linear trend in a log-log plot), and  $c$  denotes the density constant. The power law exponent  $\alpha$  is of main interest herein, since it measures the relative proportion of short and long features (Davy, 1993; Pickering et al., 1995). As fault data is often acquired at a single mapping scale, a major problem for the identification of power law distributions is the limited dynamic length range of the fault traces and the uncertainties related to sampling bias, which can lead to size distributions that appear to deviate from power laws (Odling, 1997; Scholz, 2007, 2019; Torabi and Berg, 2011).

Similar to faults, it is well-known that earthquake magnitudes follow power law distributions, often referred to as the Gutenberg-Richter law (Gutenberg and Richter, 1944) or magnitude-frequency distribution, implying that also earthquakes are scale invariant. As proposed by Hatton et al. (1993), "the observed fractal nature of both fault length distributions and earthquake magnitude-frequency distributions suggests that there may be a relationship between the structure of active fault systems and the resulting seismicity." This is supported by the fact that the statistical properties of micro-fracturing at the laboratory scale are similar to earthquakes (e.g., Scholz, 1968; Mogi, 1962). Furthermore, faults and fractures represent the geometrical anisotropies that provide planes of weakness within the rock masses and are thus most likely to be reactivated seismically if suitably oriented with respect to the local stress field. Faults and earthquakes can thus be regarded as the long- and short-time-scale phenomena of brittle tectonics, and there should exist an inherent relation between the size distributions of faults and earthquakes (Scholz, 2019, 1998; Turcotte, 1997). However, the relationship between these size distributions in natural datasets has yet received little attention, mainly due to the challenging acquisition of reliable quantitative information



of fault networks due to limited outcrop conditions and small dynamic range. The Southwestern Swiss Alps, with (i) a long-  
60 lasting exhumation history during **several** million years (e.g., Egli et al., 2017; Herwegh et al., 2020; Boutoux et al., 2016;  
Cardello et al., 2024), (ii) well-preserved extensive Neogene faulting in high-Alpine regions with formation depths similar to  
the present-day earthquakes (Cardello and Mancktelow, 2015; Huguenberger and Aebli, 1989; Cardello et al., 2024), (iii) an  
increased and exceptionally well-recorded seismic activity (e.g., Diehl et al., 2021a; Lee et al., 2022), and (iv) on-going vertical  
tectonics (e.g., Ustaszewski and Pfiffner, 2008; Brockmann et al., 2012; Herwegh et al., 2023; Piña-Valdés et al., 2022)  
65 implying a similar stress field to the time of fault formation, provide a unique natural laboratory to investigate the link between  
the size distributions of faults and earthquakes. Owing to the abundant occurrence of thermal springs, the region is also a  
potential target for the exploitation of geothermal energy, where knowledge of faulting at depth and constraints on the potential  
risks of induced seismicity are critical.

Herein, we explore the relation between the **size** distributions of faults and earthquakes and its implications for orogen-internal  
70 seismogenic deformation in the exhumation-related (vertical) tectonic setting of the Rawil depression region (Southwestern  
Swiss Alps). We use field observations and drone-based fault trace mapping on multiple scales to quantitatively characterize  
the size and orientation distributions of fault networks in different tectonic units. We employ a multi-scale power law fitting  
approach on the fault network data, which allows to expand the limited dynamic length range of single-scale observations. We  
then exploit the relationship of the fault orientation and size distributions with similar properties of the recent seismic activity,  
75 and discuss the implications for seismogenic fault reactivation processes in the subsurface.

## 2 Regional Setting

In the framework of a nation-wide seismic hazard assessment, Switzerland was zoned into different seismotectonic domains  
(Wiemer et al., 2016). We herein focus on the seismotectonic domain z21 in the Southwestern Swiss Alps, mainly due to its  
well-exposed rock outcrops and the exceptionally well-monitored **enhanced** seismic activity (Fig. 1). In the study area, several  
80 External Crystalline Massifs (ECMs) are exposed: the Aiguilles Rouges massif in the West, and the Aar and Gastern massifs  
in the East (Fig. 1a). Between their exhumed parts, these basement units form a saddle-like structure, commonly referred to as  
the Rawil depression, which is overthrust by the Helvetic limestone nappes (Burkhard, 1988; Dietrich, 1989; Dietrich and  
Casey, 1989; Ramsay, 1989, 1981). The Helvetic nappe system is composed of different, heavily folded nappes, which have  
been stacked on top of each other during an early thin-skinned deformation phase of the Alpine orogen (e.g., Musso Piantelli  
85 et al., 2022; Escher et al., 1993; Pfiffner 1993; Burkhard, 1988; Ramsay, 1981, 1989). In a late-Alpine stage, dominated by  
thick-skinned vertical tectonics, both the crystalline basement units and the Helvetic limestones have been heavily affected by  
late-Alpine deformation, resulting in pervasive and complex faulting that affects all tectonic units (Cardello and Mancktelow,  
2015; Gasser and Mancktelow, 2010; Huguenberger and Aebli, 1989; Herwegh et al., 2020, 2023; Cardello et al., 2024). Some  
of the predominantly subvertical late-Alpine faults have been linked to the regional seismic activity (Cardello and Mancktelow,  
90 2015; Pavoni, 1980a; Ustaszewski et al., 2007; Ustaszewski and Pfiffner, 2008; Pavoni and Mayer-Rosa, 1978; Cardello et al.,



2024). Apart from the Rhône-Simplon Fault Zone (RSF) along the southern margin of the study area (e.g., Campani et al., 2014, 2010; Egli and Mancktelow, 2013; Mancktelow, 1985), regional-scale faults are largely absent at the surface of the study area. The nappes of the Helvetic units are separated by shallow-dipping thrust faults which are arguably not seismically active nowadays (Lee et al., 2022), so we herein do not discuss these thrusts further.

95 The presently dense seismic monitoring network in the region resolves the seismic activity exceptionally well, detecting earthquakes with a magnitude of completeness  $M_c$  of about  $M_L \approx 1.5$  until 2016 and about  $M_L \approx 1.0$  thereafter (Diehl et al., 2021a; Lee et al., 2023). The earthquakes predominantly occur in a NE-SW striking, elongated corridor in the center of the Rawil depression (Fig. 1b), which is referred to as the conceptual Rawil Fault Zone (RFZ) (Lee et al., 2023). The seismicity at depth arguably reactivates a complex system of subvertically oriented faults (Diehl et al., 2021a, 2018; Lee et al., 2023; 100 Truttmann et al., 2023). This is supported by the variety of previously published, predominantly strike-slip-type focal mechanisms shown in Fig. 1b (Baer et al., 2005, 2003, 1997; Deichmann et al., 2012, 2006, 2002, 2000; Delacou et al., 2005; Diehl et al., 2021a, 2018, 2013; Jimenez and Pavoni, 1983; Maurer, 1993; Maurer and Deichmann, 1995; Pavoni et al., 1997; Truttmann et al., 2023), suggesting an overall transtensional regime (Kastrup et al., 2004).

The Southwestern Swiss Alps are further characterized by their long-lasting vertical tectonics. During the latest stage of the 105 Alpine orogeny, thick-skinned tectonics prevailed and led to the exhumation of the ECMs (e.g., Herwegh et al., 2020; 2023; Boutoux et al., 2016). Recent uplift rates in the range of 1 mm per year (Brockmann et al., 2012; Piña-Valdés et al., 2022) and the pronounced seismic activity document the ongoing exhumation (Figs. 1b and c). As a consequence of these long-lasting vertical tectonics, a similar stress field likely prevailed during both the formation of the exhumed fault networks and today's earthquakes.

110 In summary, the investigated seismotectonic domain reveals complex and pervasive fault networks, well-recorded seismic activity, and long-lasting vertical tectonics. In our view, the Rawil depression region in the Southwestern Swiss Alps thus provides a unique natural laboratory to elaborate the statistical link between faults and earthquakes in an orogen-internal setting.

### 3 Data and Methods

#### 115 3.1 Fault Networks

##### 3.1.1 Fault Data

We selected four sites along the Rawil depression to conduct detailed analysis of the fault networks in the ECM units of (A) the Aiguilles Rouges massif and (D) the Gastern massif, as well as in the Helvetic limestones of (B) the Diablerets and (C) the Wildhorn nappes (Fig. 1). As pronounced glacial and fluvial erosion, vegetation and Quaternary cover greatly limit the outcrop 120 conditions and thus affect reliable sampling of fault networks, we selected sites with little weathering, vegetation, and



Quaternary cover, as well as flat terrain to minimize topographic effects (Baumberger et al., 2022), which were encountered only at high altitude sites.

At each site, we performed detailed characterization of the fault networks (Fig. 2a). We carried out drone-based surveys (DJI Mavic 2 Pro; Hasselblad L1D-20c camera) at two different observation heights to produce orthorectified images (orthophotos) and Digital Elevation Models (DEMs) with Agisoft Metashape (v1.6.6) at mm and cm ground resolutions (see Table 1). Additionally, we used orthophoto and DEM products at dm ground resolution from the Federal Office of Topography swisstopo. We then manually digitized the visible fault traces at fixed mapping scales of 1:10, 1:100, and 1:1'000 within circular mapping areas, preferring circular extents to minimize potential orientation bias (e.g., Bonnet et al., 2001) (Table 1, Fig. 2a). Fault traces are herein defined as curvilinear features that represent the intersections between a fault plane and the Earth's surface (Baumberger et al., 2022; O'Leary et al., 1976), which serve as a proxy for the pre-existing geometrical anisotropies. As such pre-existing anisotropies are likely to be reactivated also in today's stress field if suitably oriented, and the power law exponents are insensitive to the type of fracture (Bonnet et al., 2001; Marrett et al., 1999), we chose to incorporate also mode I fractures but, for the sake of simplicity, generally refer to these geological discontinuities as faults. Unambiguous differentiation of faults from other discontinuities such as bedding structures based on remote sensing alone is often ambiguous, which is why we systematically validated the fault maps in the field to ensure their representativeness of the real fault populations. We also measured both the 3D orientations of the faults and where possible the kinematic indicators (i.e., slickensides) in the field.

Despite thorough data collection, mapping of fault traces includes several limitations. The detectability of fault traces by remote sensing depends on both the fault length, the image resolution, the mapping scale, and the degree of erosion of the related tectonites (i.e., the resulting morphological incision). Furthermore, image artifacts caused by illumination or shadow effects in low contrast domains or by partial coverage of the bedrock by Quaternary debris or vegetation can prohibit the appropriate identification of faults. These factors lead to deviations from the true fault trace length which in terms influences the quantitative analysis (e.g., Cao and Lei, 2018). To minimize such potential artifacts, we carefully selected sites with little Quaternary cover and topographic effects, and acquired the images in similar light conditions. Areas covered by debris or vegetation were excluded as "no data" areas. The influence of the remaining uncertainties is further discussed in section 5.1.

### 3.1.2 Statistical Analysis of Fault Networks

We used the data from the fault trace maps to quantify both the orientation and size distributions of the fault networks. To describe their 2D orientation distribution, we derived length-weighted rose diagrams from the fault traces for each individual dataset presented in Table 1 (Fig. 2a). Additionally, we used field measurements to characterize the 3D orientation distribution of the fault networks, as well as their kinematics. The 2D and 3D distributions capture different aspects of the fault orientations: while the 3D distribution yields information about the dip range of the fault sets, the 2D orientation distribution from the fault trace maps represents a better-suited quantitative measure of the dominant strike orientations.



In a next step, we evaluated the size (or length) distribution of the fault networks from the four sites. We assume an underlying power law distribution, which is most commonly used to model fault size distributions (e.g., Bonnet et al., 2001; Bour et al., 2002; Odling, 1997; Scholz et al., 1993; Torabi and Berg, 2011; Yielding et al., 1996; Davy et al., 2010; Scholz, 2019). In nature, all power laws must have upper and lower limits (Bonnet et al., 2001; Torabi and Berg, 2011; Turcotte, 1997, 1989). For faults, the upper limit is likely related to the thickness of the crust or the stratigraphic layering, while the lower limit is constrained by a physical length scale (e.g., grain size). Defining these limits is nontrivial, and deviations from a power law in the tails of the size distribution of fault networks commonly occur presumably independent of the physical limits of the system. Instead, sampling bias such as truncation and censoring effects can result in size distributions that appear to be exponential or log-normal (Bonnet et al., 2001; Odling, 1997; Odling et al., 1999; Torabi and Berg, 2011). Due to the underestimation of the frequency of small faults, these structures are systematically underrepresented due to the limited resolution of the orthophotos and DEM's, which is commonly referred to as truncation (Bonnet et al., 2001; Bour et al., 2002; Torabi and Berg, 2011) (Fig. 2b). The truncation length  $l_{\text{trunc}}$  defines the length above which faults can be reliably detected. Similarly, large faults are more likely to lie partially outside the boundaries of the sampling area, so their lengths and frequencies are often systematically underestimated (Bonnet et al., 2001; Pickering et al., 1995). This leads to a steepening of the curve at the upper tail of the distribution, commonly called censoring effect (Fig. 2b). Note that the fault lengths at which truncation and censoring effects occur do not necessarily correspond to the true physical limits of the power law distribution (Bonnet et al., 2001). Since both truncation and censoring effects in natural fault datasets are often rather pronounced, it is a major challenge to identify the scaling range where the distribution follows a power law. It is therefore crucial to ensure that the power law fitting is based on a large range of fault lengths, ideally spanning values over 2 to 3 orders of magnitude (Bonnet et al., 2001). Practical issues and mapping bias (see previous section), however, prevent the acquisition of high-resolution orthophotos over large areas that would be required for this. On a single observation scale, the length range is thus limited, rendering the identification of power law distributions challenging (Bonnet et al., 2001; Bour et al., 2002; Davy et al., 2006; Pickering et al., 1995; Scholz, 2007). To overcome these limitations, we herein used a multi-scale approach, combining the observations from different mapping scales (Fig. 2b). The basic idea is to normalize the fault density with the fractal area, which allows to greatly extend the length range (e.g., Bonnet et al., 2001; Heffer and Bevan, 1990; Odling, 1997). The normalized density size distribution is given as (Bour et al., 2002; Davy et al., 1990)

$$n(l, L) = c l^{-\alpha_F} L^D \quad (2)$$

with  $l$  as the fault trace length,  $c$  representing the fault density,  $\alpha_F$  as the power law exponent of the fault networks, and  $L^D$  denotes the area term. The latter is defined by the diameter of the study area  $L$  and the fractal dimension  $D$  of the fault trace barycenters (i.e., the centroids of the fault traces) and fixes the number of structures of a given length per unit fractal area independently from the observation scale and is thus a scale-independent measure (Davy et al. 1990, Bour et al. 2002). This allows for comparison of the data obtained at different scales.



The fractal dimension  $D$  was derived with the two-point correlation function  $C_2$  (Hentschel and Procaccia, 1983; Vicsek, 1992), which describes the spatial correlation of fault trace barycenters and has been suggested as an appropriate measure for  $D$  of fault networks (Bonnet et al., 2001; Bour et al., 2002; Bour and Davy, 1999; Davy et al., 1990). It is defined as:

190

$$C_2(r) = \frac{1}{N^2} N_d(r) \quad (3)$$

where  $N$  is the total number of fault trace barycenters and  $N_d$  is the number of pairs whose barycenter interdistance is less than  $r$  (Hentschel and Procaccia, 1983). For fractal populations,  $C_2(r)$  scales with  $r$  as  $r^D$ , with  $D$  as the correlation dimension.  
195 Following Bonnet et al. (2001), we estimated the fractal dimension by identifying a plateau of the local slopes of  $D$ .

To then fit the fault trace data with equation (2), we only extracted the unbiased data from each fault trace map. To account for truncation effects, we determined the truncation length  $l_{\text{trunc}}$  with the approach of Alstott et al. (2014) and Clauset et al. (2009), using the Kolmogorov-Smirnov (KS) distance as a measure for the goodness of fit between the fitted power law and the data. Hereby, the minimum KS distance defines  $l_{\text{trunc}}$  (Fig. S1). We then removed all fault traces with lengths smaller than  
200  $l_{\text{trunc}}$ . We also accounted for censoring effects by removing faults that intersect the sampling window (Lei et al., 2015). The measured fault densities of each mapping scale  $n(l)$  were then normalized with the area term  $L^D$ . We finally fitted the normalized dataset with a power law using Maximum Likelihood Estimation (MLE). This is commonly preferred over linear regression (Clauset et al., 2009; Goldstein et al., 2004). We finally obtained power law size distributions which, owing to the multi-scale approach, span several magnitudes of fault lengths (Fig. 2b). As the number of fault traces is critical for the reliable  
205 extraction of power law exponents (Zeeb et al., 2013), and the number of fault is rather small for non-dominant orientations, we chose to not incorporate orientation-dependent  $\alpha_F$  values but rather derived a single bulk value of  $\alpha_F$  for the respective site.

### 3.2 Earthquakes

We analyzed the recent seismicity within four subdomains of the seismotectonic domain z21 of Wiemer et al. (2016), each associated with one of the fault mapping sites A to D (Fig. 1b). In analogy with the fault data, we characterized both the  
210 orientation and size distributions of the earthquakes within these subdomains.

The orientation of the rupture plane activated during an earthquake often remains unknown, and the determination of the orientation distribution of seismic ruptures is thus challenging. However, focal mechanisms (e.g., determined by the polarities of the first arriving P waves) give a first-order constraint on the orientation of the ruptured plane for earthquakes with significant energy release. Such first-motion focal mechanisms yield an ambiguous solution with two possible rupture plane  
215 orientations. Additional constraints such as the spatial distribution of hypocenters can in some cases be used to decipher the activated ruptured plane (e.g., Truttmann et al., 2023), but this information is often lacking. For this study, we compiled previously published focal mechanism data as shown in Fig. 1b (Baer et al., 2005, 2003, 1997; Deichmann et al., 2012, 2006, 2002, 2000; Delacou et al., 2005; Diehl et al., 2021a, 2018, 2013; Jimenez and Pavoni, 1983; Maurer, 1993; Maurer and





220 Deichmann, 1995; Pavoni et al., 1997; Truttmann et al., 2023), which partly incorporates information about the active rupture plane. Based on these focal mechanisms, we evaluated the 3D orientation distribution of earthquake ruptures within each subdomain by plotting the nodal planes in stereographic projections and incorporate, where available, the information about the effectively ruptured plane.

225 We consecutively analyzed the size distribution of earthquakes, using the data from the earthquake catalog published by Diehl et al. (2021b) (Fig. 1b). Indications exists that the  $M_L$  magnitudes in the SED bulletin include inconsistencies between earlier and modern epochs due to changes in instrumentation and determination procedures of magnitudes (Staudenmaier et al., 2018). We therefore only considered events after 2005, for which the  $M_L$  magnitudes are derived from digital data in a relatively consistent manner. As we are interested in a measure that is directly comparable to the size distribution of faults, we herein derived the size distribution of earthquake ruptures rather than the magnitude or seismic moment, which serves as a proxy for the recently activated part of the fault network at depth. This approach is justified by the fact that the earthquake magnitude is 230 directly related to the ruptured fault length (e.g., Wells and Coppersmith, 1994). Therefore, we translated the local magnitudes  $M_L$  to the earthquake rupture lengths  $l_R$ . After converting the recorded local earthquake magnitude  $M_L$  to the moment magnitude  $M_w$  after Goertz-Allmann et al. (2011) using an empirical  $M_L$ - $M_w$  scaling relationship, we derived the earthquake rupture area  $A_R$ , given as:

$$235 \quad A_R = 10^{\frac{(M_w - a)}{b}} \quad (4)$$

where  $a$  and  $b$  represent constants derived from empirical scaling relations (e.g., Wells and Coppersmith, 1994). We herein used three different scaling relations determined for strike-slip earthquakes in stable continental regions with  $a = 4.18$  and  $b = 1$  (Leonard, 2014),  $a = 3.49$  and  $b = 0.94$  (Thingbaijam et al., 2017), and  $a = 3.98$  and  $b = 1.02$  (Wells and Coppersmith, 1994). 240 From  $A_R$ , we then calculated the earthquake rupture length  $l_R$  under the assumption of a circular rupture plane. Based on this new dataset containing a rupture length for each earthquake, we then employed the MLE power law fitting procedure of Alstott et al. (2014) and Clauset et al. (2009) using equation (1) to derive the power law exponent  $\alpha_R$  of the earthquake ruptures.  $\alpha_R$  represents a modified  $b$ -value that is the commonly used power law exponent in seismology. Similar to the fitting procedure of the fault data, we used the minimum KS distance as a measure for the optimal truncation length (Fig. S2), which is 245 comparable to  $M_c$  often used by seismologists.

## 4. Results

### 4.1 Fault Networks

Based on remote sensing, we identified between 1'608 and 10'894 fault traces on each of the 12 different maps (Table 1, Fig. 3). In the following, we use these data to characterize the fault networks in terms of their orientation and size distributions.





#### 250 4.1.1 Orientation Distribution

Site A is characterized by three main sets of subvertical faults identified in the field (Fig. 4a): a SE dipping ( $A_I$ ) and a NW dipping set ( $A_{II}$ ), as well as an almost perpendicular SW dipping set ( $A_{III}$ ). Set  $A_I$  consistently indicates normal movements, while  $A_{II}$  faults reveal a reverse shear sense (Fig. 4b). For set  $A_{III}$ , we only observed a single kinematic indicator, revealing oblique sinistral movements. The length-weighted rose diagrams for site A suggest that the NW-SE striking  $A_{III}$  faults are the  
255 dominant set (Fig. 3).

At site B, the measured fault planes reveal a similar 3D orientation distribution with a slight clock-wise rotation compared to site A (Fig. 4c). The SE dipping set  $B_I$  strikes parallel to the NW dipping fault set  $B_{II}$ , and perpendicular to the SW dipping set  $B_{III}$ . Both  $B_I$  and  $B_{II}$  exhibit dextral strike-slip movements (Fig. 4d), while faults of set  $B_{III}$  mostly indicate normal movements. The rose diagrams in Fig. 3 show that the NE-SW striking  $B_I$  and  $B_{II}$  faults are the most prominent sets at all scales.

260 Also at site C, steeply SE ( $C_I$ ) and NW dipping faults ( $C_{II}$ ) are the dominant sets (Fig. 4e). Set  $C_I$  exhibits large variations in strike directions, ranging from NNE-SSW to E-W. Both sets predominantly imply dextral strike-slip movements (Fig. 4f). The rose diagrams indicate that E-W to ENE-WSW are the dominant fault strike orientations, corresponding to both fault sets  $C_I$  and  $C_{II}$  (Fig. 3).

The fault network at site D is characterized by two main sets, with a diffusely oriented SE dipping set ( $D_I$ ) and a dominant  
265 subvertical, NW-SE striking fault set ( $D_{II}$ ) (Fig. 4g). For neither set  $D_I$  nor  $D_{II}$ , the kinematic indicators reveal a clear pattern (Fig. 4h). The rose diagrams in Fig. 3 reveal a bimodal distribution, with both sets  $D_I$  and  $D_{II}$  equally abundant.

In summary, we document a change in dominant fault orientations, from NW-SE striking in the Aiguilles Rouges massif (site A), to E-W and NE-SW dominated in the limestone nappes in the center of the Rawil depression (sites B and C), to a NE-SW and NW-SE bimodal fault distribution in the Gastern massif (site D).

#### 270 4.1.2 Size Distribution

To combine the fault trace data from the different scales, we first derive the fractal dimension  $D$  for each fault trace map. Using the two-point correlation function  $C_2$ , we obtain values of  $D$  between 1.64 and 1.83 (Fig. 5), suggesting a relatively homogeneous spatial fault distribution, as  $D = 2$  would imply a perfectly homogeneous spatial distribution. This is in good agreement with the qualitative observation of widespread and pervasive faulting in the area. Since the datasets from different  
275 scales reveal consistent values of  $D$ , we argue that the fractal dimension is scale-independent.

Using the obtained values of  $D$  for the area normalization (see section 3.1.2), we find that the normalized fault length data follows a linear trend in a log-log plot for all study sites, supporting the assumption of an underlying power law distribution (Fig. 6). The power law scaling seems to hold over a length range of three orders of magnitudes for fault lengths between ca.  $10^0$  to  $10^3$  m. However, as can be seen for the data of site C, for example, individual datasets slightly deviate from the power  
280 law behavior. Such deviations can be caused by sampling bias such as the choice of the sampling area of the consecutive



mapping scale, since subareas with anomalously high or low fault densities can lead to an offset in the multi-scale size distributions. We will further discuss potential uncertainties in section 5.1.

The obtained fault power law exponents  $\alpha_F$ , which are of main interest for comparison with the earthquake data, range between 2.43 and 2.73 (Fig. 6), which suggests that little regional variations exist. As the fault networks are sampled in both crystalline  
285 basement rocks as well as in the Helvetic limestone units,  $\alpha_F$  seems to be relatively insensitive to differences in lithologies. For the dimensionless fault density term  $c$ , we observe somewhat larger variations. With a value of  $c = 1.57 * 10^{-4}$ , site B reveals the lowest fault density term, while sites A, C, and D show larger  $c$  values of up to  $5.76 * 10^{-4}$ . Even though all  $c$  values range in the same order of magnitude, the fault density term varies by a factor of three for the different sites, however without any clear regional trends.

## 290 4.2 Earthquake Ruptures

Next, we assess the orientation and size distributions of seismic rupturing at depth, derived from focal mechanism data and earthquake rupture lengths for the different subdomains denoted in Fig. 1b. We therefore use a compilation of 69 previously published focal mechanisms and 4'612 earthquakes of the earthquake catalog of Diehl et al. (2021b) that lie within the seismotectonic domain z21 shown in Fig. 1 (see section 3.2).

### 295 4.2.1 Orientation Distribution

The data from the focal mechanism catalog reveals consistent rupture orientations within the different subdomains, with known earthquake ruptures predominantly occurring along subvertical, E-W to NE-SW striking planes (Fig. 7). While in subdomain A in the Aiguilles Rouges massif, the known active planes dip steeply towards the South (Fig. 7a), steeply north-dipping earthquake ruptures are observed additionally in the central and eastern subdomains C and D (Figs. 7c and d). For the data of  
300 subdomain B, currently no active rupture planes are provided in the published focal mechanism data, but ENE-WSW striking nodal planes render similar active rupture orientations possible (Fig. 7b). Together with the observation of the NE-SW directed clustering of the seismicity (Fig. 1b), this implies that the majority of the seismicity in the Rawil region occurs along subvertically oriented, E-W to NE-SW striking faults.

### 4.2.2 Size Distribution

305 As shown in Fig. 8, the size distribution of earthquake ruptures for the different subdomains all follow power laws at length scales between about  $10^2$  and  $10^3$  m. For the data of subdomains A and D, we observe a deviation from power law behavior in the upper tail of the distribution, likely related to individual larger earthquakes. In subdomain A, this can be attributed to the  $M_L = 4.9$  Vallorcine earthquake in 2005 (Fréchet et al., 2011), while in subdomain D, it relates to the  $M_L = 4.1$  Salgesch earthquake in 2016 (Diehl et al., 2018). In subdomains B and C, we observe well-defined power law distributions for the  
310 earthquake rupture lengths. The three used empirical  $M_w - A_R$  scaling laws all yield similar values of  $\alpha_R$ , which indicates that a significant dependency from the used empirical scaling relations on the obtained power law exponents appears unlikely (Fig.



8). In general, the derived earthquake rupture power law exponents  $\alpha_R$  all range between values of 3.88 and 4.81, implying little along-strike variations in the  $\alpha_R$  values. As the size distribution of earthquakes often shows variations with depth, we further investigate a possible depth-dependency in section 5.4.

315 Overall, the  $\alpha_R$  and  $\alpha_F$  exponents exhibit significant differences that are unlikely to be solely attributed to uncertainties. These differences will be further explored in the discussion section.

## 5. Discussion

### 5.1 Uncertainties in Fault Size Distributions

In the following, we discuss two of the major uncertainties related to data sampling that can affect the fault size distributions:

320 (i) the finite mapping resolution of fault trace lengths, and (ii) the choice of the subsampling mapping area as well as the potential bias due to manual mapping.

Mapping fault traces on a fixed mapping scale on imagery with a given finite resolution necessarily leads to a bias in the derived fault lengths, as the terminations of the fault traces can only be mapped with a certain accuracy that is dependent on the image resolution.

325 This potentially shifts the data along the horizontal axis of a log-log plot, leading to variations in the derived power law exponent  $\alpha_F$ . We here use the rather conservative assumption that the fault trace lengths are mapped with errors  $\epsilon$  of 0.05 m (1:10), 0.5 m (1:100), and 5 m (1:1000) at the different mapping scales. We then randomly perturb all measured fault traces with length values between  $[-\epsilon, \epsilon]$  with a uniform distribution and calculate the  $\alpha_F$  value for 100 Monte Carlo (MC) simulations. As shown in Fig. 9a, the normalized density distributions show relatively little variation. The derived mean power law exponents  $\alpha_F$  between 2.14 and 2.80 are similar to the values reported in Fig. 6, and the standard deviations of up to 0.15 suggests that the influence of uncertainties related to fault length estimation on  $\alpha_F$  is small (Fig. 9b).

335 As the multi-scale approach used in this study relies on fault datasets from different scales, it is critical to assess the influence of the choice of different subsampling areas. The derived fractal dimension values below two suggest that the fault density is not a perfectly homogeneous property in the investigated fault networks (Figs. 3 and 5). Therefore, the spatial choice of the subsampling area for the next detailed scale leads to uncertainties in the size distribution, as differences in fault densities shift the data along the vertical axis, affecting the calculation of  $\alpha_F$ . Additionally, fault traces may be overlooked or linear features not representing faults may be interpreted as faults during manual mapping of fault traces, leading to a similar effect. When selecting subsampling areas, we tried to avoid specific geometric features (i.e., fault linkages, fault terminations) and focused on minimizing topographic effects and Quaternary cover, since these factors can significantly bias the power law exponent estimates, leading to an overestimation of  $\alpha_F$  (Cao and Lei, 2018). To assess the influence of changes in fault densities due to the arbitrary choice of the subsampling area, we randomly altered the number of mapped faults from -25 to +25% and derive  $\alpha_F$  for 100 MC simulations. Compared to the fault trace length uncertainties, the effect of the subsampling area uncertainties is more pronounced (Figs. 9c and d). However, the derived  $\alpha_F$  values still vary in a small range between 2.44 and 2.86, with standard deviations of up to 0.29.



345 We conclude from this analysis that both uncertainties related to the fault trace length estimation as well as the choice of the subsampling area and manual mapping have limited influence on the derived power law exponents  $\alpha_F$ . We thus expect the true power law exponents of the fault networks  $\alpha_F$  to range between 2.5 and 3, with little regional and lithological variation. 

## 5.2 Fault Network Characteristics

350 The fault networks from the four different study sites across the Rawil depression illustrate the pervasive but systematic faulting in the study area (Fig. 3). Interestingly, the 2D orientation distributions for an individual site appear to be consistent across scales (Fig. 3), which is in agreement with the findings of Odling (1997). This implies that the fault orientations are self-similar, and thus scale-independent, suggesting that a single-scale mapping should be sufficient to capture accurate information on the orientation distribution within a fault network. Comparing the fault networks of the different sites, however, we observe variations in the dominant strike orientations (Fig. 3). While in the ECMs, both at site A in the Aiguilles Rouges massif and site D in the Gastern massif, NW-SE and NE-SW striking faults prevail, the limestone nappes overlying the central part of the Rawil depression are characterized by predominantly E-W to NE-SW striking faults. NE-SW striking faults are 355 however also present in both sites A and D, implying that these faults are regional features, roughly following the direction of the RSF and the seismogenic RFZ (Fig. 1a).

The  $\alpha_F$  values for the four different study sites are all in the same order and range between 2.5 and 3 (Fig. 6). As shown in

Table 2, these results are in good agreement with previously published values that generally lie between 2 and 3, which suggests  
360 that this range can be seen as a first-order universal law of fault size distributions, independent of the host rock lithology. Also  
the derived fractal dimension  $D$  values of around 1.7 are consistent with values reported in literature (Bonnet et al., 2001 and  
references therein).

The multi-scale approach used herein has the benefit to greatly expand the length range of the individual fault trace datasets  
365 compared to single-scale analysis (Figs. 2b and 6). The power law distributions derived in this study cover fault length scales  
of three orders of magnitudes between about  $10^0$  and  $10^3$  m, and it is likely that the power law holds also for smaller and larger  
faults. In nature, however, all power laws must have upper and lower physical limits (Bonnet et al., 2001; Torabi and Berg,  
2011; Turcotte, 1997, 1989). The detected lower scaling limit of  $10^0$  m likely does not reflect the actual physical length scale  
(e.g., caused by grain size effects), and we thus speculate that our analysis does not incorporate the lower limit of the power  
370 law scaling. Identifying the true limit of the power law would require similar analysis of high-resolution datasets at smaller  
scales. The derived upper limit of around  $10^3$  m is way below the assumed thickness of the seismogenic part of the crust of  
around 15 kilometers, as well as the thickness of the Helvetic nappe system of a few kilometers (Burkhard, 1988; Levato et  
al., 1994; Pfiffner et al., 1997; Steck et al., 1997). However, stratigraphic layering effects within the Helvetic nappes (e.g.,  
Pfiffner, 1993) could influence the upper limit of the power law size distributions (Odling, 1997), at least for sites B and C.  
375 Since the upper scaling limits do not significantly differ between the different lithologies, we consider this effect to be of minor  
importance within the observed length range. We thus assume that our data only covers a limited length range of the actual  
fault size distribution, and that the power law scaling holds for smaller and larger faults than studied herein. This interpretation  
is supported by the fact that the previously reported  $\alpha_F$  values for lengths between  $10^{-1}$  and  $10^5$  m all lie in a similar range (



Table 2).

### 5.3 Potential Links to the Seismicity

380 The strong vertical components due to the exhumation-related tectonics during the latest stage of the Alpine orogeny, accompanied by enhanced glacial surface erosion in the past 2 Ma (Häuselmann et al., 2007; Glotzbach et al., 2010; Valla et al. 2012; Fox et al., 2015; Sternai et al., 2019), led to the exposure of the fault networks studied herein (Egli et al., 2017; Herwegh et al., 2020; Cardello et al., 2024). Based on observations of both exhumed fault patterns, earthquake hypocenter locations, and focal mechanisms, previous authors suggested that the exhumed fault networks in the region of the Rawil  
385 depression were formed under a similar stress field that prevails today (Cardello and Mancktelow, 2015; Maurer et al., 1997; Pavoni, 1980a, b). As earthquakes and faults are inherently related, they are expected to exhibit similar orientation and size distributions (Bonnet et al., 2001; Scholz, 2007, 1998, 1997). In the following, we attempt to compare these statistical properties of the exhumed fault networks with the same properties of the seismicity in the study region.

Comparing the orientation distributions of the fault networks (Figs. 3 and 4) with the earthquake ruptures (Fig. 7) in a first  
390 step, we observe a correlation only in the center of the Rawil depression for study sites and subdomains B and C. The E-W to NE-SW striking fault set  $C_I$  (Figs. 4e and f) correlates with the active planes from the respective subdomain C (Fig. 7c). The dextral strike-slip kinematics of the NE-SW striking faults reveals striking similarities with the kinematics of the earthquake ruptures (Figs. 4f and 7c). In subdomain B, where no active nodal planes are deciphered (Fig. 7b), the average orientation of the nodal planes generally renders earthquake rupturing along E-W to NE-SW striking planes possible, which would  
395 correspond to reactivation of fault sets  $B_I$  and  $B_{II}$  (Figs. 4 c and d). However, recent high-precision hypocenter datasets suggest that NW-SE striking fault planes are reactivated at least in the northern part of the Rawil depression (Diehl et al., 2024). In the ECMs on both sides of the Rawil depression, the correlation between the orientation distributions is less clear. In subdomain A, earthquake ruptures strike ENE-WSW (Fig. 7a), likely corresponding to the SE dipping  $A_I$  faults (Fig. 4a). It thus seems that the recent earthquakes mainly reactivate prevailing  $A_I$  faults as strike-slip faults (Fig. 7a). The E-W striking active rupture  
400 planes in subdomain D (Fig. 7d) are not reflected by the bimodal fault network of site D at all (Fig. 4g), which is therefore likely not a good proxy for the E-W directed seismicity in subdomain D. This might be due to the fact that the chosen study site lies slightly outside the main seismic corridor. This difference could be explained by mechanically detached Aar and Gastern massifs, which also exhibit significantly lower seismic activity (Fig. 1b). The mapped NW-SE striking faults could thus represent the eastern lateral boundary of the main E-W to NE-SW striking seismogenic RFZ (e.g., Lee et al., 2022).  
405 Overall, earthquake ruptures in the Rawil depression and the RFZ seem to occur mainly along subvertical E-W to NE-SW striking planes, and the exhumed fault networks show similar directivities at least in the central part of the Rawil depression above the main earthquake corridor (Fig. 1b). This implies that the active faults in the basement are consistent with exhumed fault networks in the Helvetic nappes, indicating a link across lithologies. Combined with the observation that  $\alpha_F$  values reveal little sensitivity to lithological variations, we argue that the fault networks of sites B and C serve as a good first-order analog  
410 of the seismically reactivated fault networks at depth.



#### 5.4 Implications for Orogen-Internal Settings

As earthquakes usually occur several kilometers below the surface where direct information about the prevailing fault networks is sparse, the underlying processes of seismogenic deformation often remain uncovered. However, (i) the good agreement of faults and earthquakes in terms of their orientation distributions, (ii) the insensitivity of  $\alpha_F$  to lithological variations, and (iii) the observation that both features arguably formed in a similar stress field (Cardello and Mancktelow, 2015; Maurer et al., 1997; Pavoni, 1980a, b) imply that the exhumed fault networks in our study area might serve as good first-order analog for the fault networks at depth. We therefore attempt to compare the size distributions of the fault networks and earthquake ruptures in a next step. As the power law exponent of fault networks is dependent on the dimensionality of the data (e.g., Bonnet et al., 2001), we have to consider that the power law exponents were obtained from 2D (faults) and 3D (earthquake ruptures) observations, respectively. Stereological considerations have demonstrated that the differing dimensionalities can be corrected for by employing the equation  $\alpha_{3D} = 1.28 * \alpha_{2D} - 0.23$  (Bonnet et al., 2001; Borgos et al., 2000; Hatton et al., 1993). Consequently, the 3D power law exponents of the fault networks  $\alpha_{F(3D)}$  is ranging somewhere between 3 and 3.6.

The power law exponent of the earthquake size distributions, commonly referred to as b-value by seismologists, has been proposed to decrease with increasing differential stress and thus depth (Mori and Abercrombie, 1997; Spada et al., 2013; Scholz, 2019, 2015). We therefore assess the depth-dependent variations of the frequency and size distribution of earthquake ruptures. As no significant lateral variations in  $\alpha_R$  values were observed within the investigated seismotectonic domain (Fig. 8), we calculate  $\alpha_R$  values for depth-slices that incorporate the entire seismotectonic domain. To minimize potential bias due to the data selection, we randomly iterate through different combinations of depth thresholds, and only fit a power law for entities with more than 200 data points. Since the majority of vertical uncertainties in the modern era of the earthquake catalog are in the subkilometer range (Diehl et al., 2021b; Lee et al. 2023), we do not consider hypocenter uncertainties.

As shown in Fig. 10a, earthquakes in the study area occur most frequently at depths between 3 and 8 km. The maximum rupture lengths lie, with few exceptions, on the order of  $10^2$  m for depths shallower than 3 km, with significantly larger ruptures up to  $10^3$  m occurring at depths between 3 and 9 km (Fig. 10b). At greater depths, the seismicity becomes sparse, and maximum rupture lengths generally decrease, which could be due to the increasing component of temperature-dependent viscous deformation representing the brittle-viscous transition at the lower depth end (e.g., Wehrens et al., 2016). As expected  $\alpha_R$  values generally decrease with depth (Fig. 10c), in line with previous studies (e.g., Mori and Abercrombie, 1997; Spada et al., 2013). However, the values for shallow (< 3 km) and intermediate (3 – 9 km depth) crustal earthquakes differ significantly: while shallow earthquakes reveal  $\alpha_R$  values around 5 to 8, values for intermediate earthquakes constantly decrease with depth to values of around 3.5. Comparing the  $\alpha_R$  values with  $\alpha_{F(3D)}$  of the exhumed fault networks, we notice that for shallow earthquake ruptures a significant discrepancy to the  $\alpha_{F(3D)}$  values exists (Fig. 10c). For intermediate earthquakes,  $\alpha_R$  and  $\alpha_{F(3D)}$  values converge towards similar values at around 8 km depth. This observation could potentially be explained by the following two hypotheses.





445 First, it could be stated that similarly to  $\alpha_R$ , also  $\alpha_{F(3D)}$  values decrease with depth. This cannot be strictly proven, as fault  
networks at depth are not directly accessible. The enhanced earthquake frequency at depths  $> 3$  km, however, suggests that the  
majority of brittle faults are formed at intermediate depth levels (Fig. 10a). Even though faulting certainly occurs at shallow  
450 depths  $< 3$  km during exhumation as well, the significantly lower earthquake frequency implies that the majority of faults in  
the exhumed fault networks were formed at intermediate depth levels. This interpretation is supported by the proposed  
formation depths of exhumed faults in the surrounding of the Rawil depression derived from geological field observations  
(Cardello and Mancktelow, 2015; Gasser and Mancktelow, 2010; Ustaszewski et al., 2007; Cardello et al., 2024). Together  
with the absence of significant lithological variations of  $\alpha_F$  and the consistency with previously reported values from a large  
variety of tectonic settings (



Table 2), we consider this first hypothesis as unlikely.

As a second hypothesis, we thus propose that the  $\alpha_{F(3D)}$  values are relatively constant with depth, and  $\alpha_{F(3D)}$  and  $\alpha_R$  converge towards similar values at intermediate depths. According to this argumentation, the decrease in  $\alpha_R$  values therefore records variations in the reactivation potential of pre-existing faults at different depth levels due to increasing differential stresses. As the differential stresses are smaller at shallow depths, rupture initiations are more likely to stop before growing into large earthquakes, which leads to larger  $\alpha_R$  values (Mori and Abercrombie, 1997). In contrary, with increasing differential stress, the likelihood of a rupture initiation (i) to grow into a large earthquake that reactivates the full available fault length and (ii) to jump across multiple fault segments is increasing (Manighetti et al., 2007), leading to a convergence of  $\alpha_R$  and  $\alpha_{F(3D)}$  values at intermediate depths. We propose that the similarities in the power law exponents at depths around 6 to 8 km reveal that earthquakes are more likely to rupture along the entire fault length at these depths.

Apart from the influence of differential stress, previous studies have shown that also other factors such as the faulting type (Gulia and Wiemer, 2010; Petruccelli et al., 2019a, 2019b; Schorlemmer et al., 2005) or material heterogeneities (Mori and Abercrombie, 1997; Mogi, 1962; Goebel et al., 2017) can lead to changes in the earthquake power law exponents. As the dominant orientations of both the fault networks and earthquake ruptures are in good agreement (Figs. 4 and 7), and the focal mechanisms mostly imply transtensional movements (Kastrup et al., 2004), we argue that the faulting style has a minor influence on the observed variations in our case. Material heterogeneities, such as differences in lithologies, could potentially explain the increased  $\alpha_R$  values at shallow depths above 3 km, as this depth correlates with the proposed basement-cover contact below the Rawil depression (Burkhard, 1988; Levato et al., 1994; Pfiffner et al., 1997; Steck et al., 1997; Lee et al. 2023). Stratigraphic layering effects due to the finite thickness of the Helvetic limestone units may limit the size of earthquake ruptures, increasing the  $\alpha_R$  values at this lithological boundary (Ouillon et al., 1996). However, since the derived  $\alpha_{F(3D)}$  values of the limestone and crystalline basement units are rather similar, and the discrepancy between the size distributions of exhumed faults and earthquake ruptures occurs at shallow depths, we argue that the elevated  $\alpha_R$  values at shallow depths cannot be explained by differences in material heterogeneities alone, in line with the findings of Scholz (1968). As an additional factor, the existence of fluids impacting pore pressure and friction can weaken the strength of the faults in the uppermost crust, preventing accumulation of larger amounts of stresses.

In summary, the depth-dependent comparison of the size distributions of faults and earthquakes suggests that the likelihood of an earthquake rupture to reactivate the entire fault length is higher at intermediate crustal depths, while for shallower earthquakes differential stresses are rather small, rendering earthquakes that rupture the full available fault length less likely, which is similar to the interpretations of Tormann et al. (2014) and Hetényi et al. (2018). As illustrated in Fig. 11, partial seismic rupturing thus seems to be the common seismogenic deformation mode at shallow depth in the Rawil depression region. However, it should be noted that other factors, such as lithological changes and the presence of fluids, can influence fault strength. Consequently, the observed depth-dependent fault reactivation potential may differ in other regions. To assess the universality of this observation, further investigations in different settings are required.



## 485 6. Conclusion

The comparison of the statistical properties of faults and earthquakes point towards differences in the seismogenic deformation processes in the investigated orogen-internal setting, characterized by pervasive faulting and distributed seismicity. Our findings show that the potential of pre-existing faults to reactivate seismically seems to vary with depth, likely associated with depth-dependent changes in differential stresses (Fig. 11): while partial seismogenic rupturing of faults is the dominant deformation mode at shallow depths (< 3 km BSL), earthquakes are more likely to reactivate the entire fault length at  
490 intermediate depths (ca. 3 to 9 km BSL) in the Rawil depression region. Initiating earthquake ruptures thus reactivate the full available fault length predominantly at intermediate crustal depths.

The earthquake activity at shallow and intermediate depths furthermore documents ongoing brittle deformation in the Rawil depression region. As a consequence, recent faulting processes likely enhance the permeability of pre-existing faults, which  
495 could be of great interest for the exploration of the geothermal potential within such orogen-internal settings. In light of potential induced seismicity, our findings indicate that shallow fault systems are less likely to rupture over the entire length than deeper ones. Furthermore, quantitative information about orientation and size distributions of fault networks such as obtained herein are crucial for accurate modelling of recent fluid flow within intricate fault networks. Similar investigations, incorporating the statistical properties of both fault networks and earthquake datasets, could therefore potentially be used for  
500 innovative geothermal exploration in orogen-internal settings.



## Data Availability

The data that support the findings of this study are openly available in Zenodo at <https://zenodo.org/records/13829055> (Truttmann et al., 2024).

## 505 Author Contribution

ST and MH conducted field work. ST performed the formal data analysis with support of all co-authors. ST, TD, MH, and SW wrote, reviewed and edited the manuscript.

## Competing Interests

The authors declare that they have no conflict of interest.

## 510 Acknowledgments

This work was funded by the Swiss Geophysical Commission and the Swiss Federal Office of Topography swisstopo, which is greatly acknowledged.

515

## References

- Ackermann, R. V. and Schlische, R. W.: Anticlustering of small normal faults around larger faults, *Geol*, 25, 1127, [https://doi.org/10.1130/0091-7613\(1997\)025<1127:AOSNFA>2.3.CO;2](https://doi.org/10.1130/0091-7613(1997)025<1127:AOSNFA>2.3.CO;2), 1997.
- Ackermann, R. V., Schlische, R. W., and Withjack, M. O.: The geometric and statistical evolution of normal fault systems: an experimental study of the effects of mechanical layer thickness on scaling laws, *Journal of Structural Geology*, 23, 1803–1819, [https://doi.org/10.1016/S0191-8141\(01\)00028-1](https://doi.org/10.1016/S0191-8141(01)00028-1), 2001.
- Alstott, J., Bullmore, E., and Plenz, D.: Powerlaw: a Python package for analysis of heavy-tailed distributions, *PLoS ONE*, 9, e85777, <https://doi.org/10.1371/journal.pone.0085777>, 2014.
- Baer, M., Deichmann, N., Fäh, D., Kradofer, U., Mayer-Rosa, D., Ruettener, E., Schler, T., Sellami, S., and Smit, P.: Earthquakes in Switzerland and surrounding regions during 1996, *Eclogae Geologicae Helvetiae*, 90, 557–567, 1997.
- Baer, M., Deichmann, N., Braunmiller, J., Bernardi, F., Cornou, C., Fäh, D., Giardini, D., Huber, S., Kaestli, P., Kind, F., Kradofer, U., Mai, M., Maraini, S., Oprsal, I., Schler, T., Schorlemmer, D., Sellami, S., Steimen, S., Wiemer, S., Woessner, J., and Wyss, A.: Earthquakes in Switzerland and surrounding regions during 2002, *Eclogae Geologicae Helvetiae*, 96, 313–324, 2003.



- 530 Baer, M., Deichmann, N., Braunmiller, J., Husen, S., Fäh, D., Giardini, D., Kästli, P., Kradolfer, U., and Wiemer, S.: Earthquakes in Switzerland and surrounding regions during 2004, *Eclogae geol. Helv.*, 98, 407–418, <https://doi.org/10.1007/s00015-005-1168-3>, 2005.
- Baumberger, R., Herwegh, M., and Kissling, E.: Remote Sensing and Field Data Based Structural 3D Modelling (Haslital, Switzerland) in Combination with Uncertainty Estimation and Verification by Underground Data, in: 3D Digital Geological Models, edited by: Bistacchi, A., Massironi, M., and Viseur, S., Wiley, 159–197, <https://doi.org/10.1002/9781119313922.ch10>, 2022.
- 535 Bonnet, E., Bour, O., Odling, N. E., Davy, P., Main, I., Cowie, P., and Berkowitz, B.: Scaling of fracture systems in geological media, *Rev. Geophys.*, 39, 347–383, <https://doi.org/10.1029/1999RG000074>, 2001.
- Borgos, H. G., Cowie, P. A., and Dawers, N. H.: Practicalities of extrapolating one-dimensional fault and fracture size-frequency distributions to higher-dimensional samples, *J. Geophys. Res.*, 105, 28377–28391, <https://doi.org/10.1029/2000JB900260>, 2000.
- 540 Bossennec, C., Frey, M., Seib, L., Bär, K., and Sass, I.: Multiscale Characterisation of Fracture Patterns of a Crystalline Reservoir Analogue, *Geosciences*, 11, 371, <https://doi.org/10.3390/geosciences11090371>, 2021.
- Bour, O. and Davy, P.: Clustering and size distributions of fault patterns: Theory and measurements, *Geophys. Res. Lett.*, 26, 2001–2004, <https://doi.org/10.1029/1999GL900419>, 1999.
- 545 Bour, O., Davy, P., Darcel, C., and Odling, N.: A statistical scaling model for fracture network geometry, with validation on a multiscale mapping of a joint network (Hornelen Basin, Norway), *J. Geophys. Res.*, 107, 2113, <https://doi.org/10.1029/2001JB000176>, 2002.
- Boutoux, A., Bellahsen, N., Nanni, U., Pik, R., Verlaguet, A., Rolland, Y., and Lacombe, O.: Thermal and structural evolution of the external Western Alps: Insights from (U–Th–Sm)/He thermochronology and RSCM thermometry in the Aiguilles Rouges/Mont Blanc massifs, *Tectonophysics*, 683, 109–123, <https://doi.org/10.1016/j.tecto.2016.06.010>, 2016.
- 550 Brockmann, E., Ineichen, D., Marti, U., Schaer, S., Schlatter, A., and Villiger, A.: Determination of Tectonic Movements in the Swiss Alps Using GNSS and Levelling, in: *Geodesy for Planet Earth*, vol. 136, edited by: Kenyon, S., Pacino, M. C., and Marti, U., Springer Berlin Heidelberg, Berlin, Heidelberg, 689–695, [https://doi.org/10.1007/978-3-642-20338-1\\_85](https://doi.org/10.1007/978-3-642-20338-1_85), 2012.
- 555 Bruyninx, C., Legrand, J., Fabian, A., and Pottiaux, E.: GNSS metadata and data validation in the EUREF Permanent Network, *GPS Solut.*, 23, 106, <https://doi.org/10.1007/s10291-019-0880-9>, 2019.
- Burkhard, P. M.: L’Helvétique de la bordure occidentale du massif de l’Aar (évolution tectonique et métamorphique), *Eclogae Geologicae Helvetiae*, 81, 63–114, 1988.
- 560 Campani, M., Mancktelow, N., Seward, D., Rolland, Y., Müller, W., and Guerra, I.: Geochronological evidence for continuous exhumation through the ductile-brittle transition along a crustal-scale low-angle normal fault: Simplon Fault Zone, central Alps, *Tectonics*, 29, 2009TC002582, <https://doi.org/10.1029/2009TC002582>, 2010.
- Campani, M., Mancktelow, N., and Courrioux, G.: The 3D interplay between folding and faulting in a syn-orogenic extensional system: the Simplon Fault Zone in the Central Alps (Switzerland and Italy), *Swiss J Geosci*, 107, 251–271, <https://doi.org/10.1007/s00015-014-0163-y>, 2014.



- 565 Cao, W. and Lei, Q.: Influence of Landscape Coverage on Measuring Spatial and Length Properties of Rock Fracture Networks: Insights from Numerical Simulation, *Pure Appl. Geophys.*, 175, 2167–2179, <https://doi.org/10.1007/s00024-018-1774-4>, 2018.
- Cardello, G. L. and Mancktelow, N. S.: Veining and post-nappe transtensional faulting in the SW Helvetic Alps (Switzerland), *Swiss J Geosci*, 108, 379–400, <https://doi.org/10.1007/s00015-015-0199-7>, 2015.
- 570 Cardello, G. L., Bernasconi, S. M., Fellin, M. G., Rahn, M., Roskopf, R., Maden, C., and Mancktelow, N. S.: Carbonate deformation through the brittle-ductile transition: The case of the SW Helvetic nappes, Switzerland, *Journal of Structural Geology*, <https://doi.org/10.1016/j.jsg.2024.105083>, 2024.
- Castaing, C., Halawani, M. A., Gervais, F., Chilès, J. P., Genter, A., Bourguine, B., Ouillon, G., Brosse, J. M., Martin, P., Genna, A., and Janjou, D.: Scaling relationships in intraplate fracture systems related to Red Sea rifting, *Tectonophysics*, 261, 291–314, [https://doi.org/10.1016/0040-1951\(95\)00177-8](https://doi.org/10.1016/0040-1951(95)00177-8), 1996.
- 575 Ceccato, A., Tartaglia, G., Antonellini, M., and Viola, G.: Multiscale lineament analysis and permeability heterogeneity of fractured crystalline basement blocks, *Solid Earth*, 13, 1431–1453, <https://doi.org/10.5194/se-13-1431-2022>, 2022.
- Clark, R. M., Cox, S. J. D., and Laslett, G. M.: Generalizations of power-law distributions applicable to sampled fault-trace lengths: model choice, parameter estimation and caveats: Power-law distributions and fault-trace lengths, *Geophysical Journal International*, 136, 357–372, <https://doi.org/10.1046/j.1365-246X.1999.00728.x>, 1999.
- 580 Clauset, A., Shalizi, C. R., and Newman, M. E. J.: Power-Law Distributions in Empirical Data, *SIAM Rev.*, 51, 661–703, <https://doi.org/10.1137/070710111>, 2009.
- Cowie, P. A., Vanneste, C., and Sornette, D.: Statistical physics model for the spatiotemporal evolution of faults, *J. Geophys. Res.*, 98, 21809–21821, <https://doi.org/10.1029/93JB02223>, 1993.
- 585 Cowie, P. A., Sornette, D., and Vanneste, C.: Multifractal scaling properties of a growing fault population, *Geophysical Journal International*, 122, 457–469, <https://doi.org/10.1111/j.1365-246X.1995.tb07007.x>, 1995.
- Davy, P.: On the frequency-length distribution of the San Andreas Fault System, *J. Geophys. Res.*, 98, 12141–12151, <https://doi.org/10.1029/93JB00372>, 1993.
- Davy, P., Bour, O., De Dreuzy, J.-R., and Darcel, C.: Flow in multiscale fractal fracture networks, *SP*, 261, 31–45, <https://doi.org/10.1144/GSL.SP.2006.261.01.03>, 2006.
- 590 Davy, P., Le Goc, R., Darcel, C., Bour, O., de Dreuzy, J. R., and Munier, R.: A likely universal model of fracture scaling and its consequence for crustal hydromechanics, *J. Geophys. Res.*, 115, B10411, <https://doi.org/10.1029/2009JB007043>, 2010.
- Davy, Ph., Sornette, A., and Sornette, D.: Some consequences of a proposed fractal nature of continental faulting, *Nature*, 348, 56–58, <https://doi.org/10.1038/348056a0>, 1990.
- 595 Deichmann, N., Baer, M., Braunmiller, J., Ballarin Dolfin, D., Bay, F., Delouis, B., Fäh, D., Giardini, D., Kastrup, U., Kind, F., Kradolfer, U., Kuenzle, W., Roethlisberger, S., Schler, T., Salichon, J., Sellami, S., Spuehler, E., and Wiemer, S.: Earthquakes in Switzerland and surrounding regions during 1999, *Eclogae Geologicae Helvetiae*, 93, 395–406, 2000.
- Deichmann, N., Baer, M., Braunmiller, J., Ballarin Dolfin, D., Bay, F., Bernardi, F., Delouis, B., Fäh, D., Gerstenberger, M., Giardini, D., Huber, S., Kradolfer, U., Maraini, S., Oprsal, I., Schibler, R., Schler, T., Sellami, S., Steimen, S., Wiemer, S.,

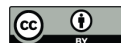

- 600 Woessner, J., and Wyss, A.: Earthquakes in Switzerland and surrounding regions during 2001, *Eclogae Geologicae Helvetiae*, 95, 294–261, 2002.
- Deichmann, N., Baer, M., Braunmiller, J., Husen, S., Fäh, D., Giardini, D., Kästli, P., Kradolfer, U., and Wiemer, S.: Earthquakes in Switzerland and surrounding regions during 2005, *Eclogae geol. Helv.*, 99, 443–452, <https://doi.org/10.1007/s00015-006-1201-1>, 2006.
- 605 Deichmann, N., Clinton, J., Husen, S., Edwards, B., Haslinger, F., Fäh, D., Giardini, D., Kästli, P., Kradolfer, U., and Wiemer, S.: Earthquakes in Switzerland and surrounding regions during 2011, *Swiss J Geosci*, 105, 463–476, <https://doi.org/10.1007/s00015-012-0116-2>, 2012.
- Delacou, B., Deichmann, N., Sue, C., Thouvenot, F., Champagnac, J.-D., and Burkhard, M.: Active strike-slip faulting in the Chablais area (NW Alps) from earthquake focal mechanisms and relative locations, *Eclogae geol. Helv.*, 98, 189–199, 610 <https://doi.org/10.1007/s00015-005-1159-4>, 2005.
- Diehl, T., Deichmann, N., Clinton, J., Husen, S., Kraft, T., Plenkers, K., Edwards, B., Cauzzi, C., Michel, C., Kästli, P., Wiemer, S., Haslinger, F., Fäh, D., Kradolfer, U., and Woessner, J.: Earthquakes in Switzerland and surrounding regions during 2012, *Swiss J Geosci*, 106, 543–558, <https://doi.org/10.1007/s00015-013-0154-4>, 2013.
- Diehl, T., Clinton, J., Deichmann, N., Cauzzi, C., Kästli, P., Kraft, T., Molinari, I., Böse, M., Michel, C., Hobiger, M., 615 Haslinger, F., Fäh, D., and Wiemer, S.: Earthquakes in Switzerland and surrounding regions during 2015 and 2016, *Swiss J Geosci*, 111, 221–244, <https://doi.org/10.1007/s00015-017-0295-y>, 2018.
- Diehl, T., Clinton, J., Cauzzi, C., Kraft, T., Kästli, P., Deichmann, N., Massin, F., Grigoli, F., Molinari, I., Böse, M., Hobiger, M., Haslinger, F., Fäh, D., and Wiemer, S.: Earthquakes in Switzerland and surrounding regions during 2017 and 2018, *Swiss J Geosci*, 114, 4, <https://doi.org/10.1186/s00015-020-00382-2>, 2021a.
- 620 Diehl, T., Kissling, E., Herwegh, M., and Schmid, S. M.: Improving Absolute Hypocenter Accuracy With 3D  $P_g$  and  $S_g$  Body-Wave Inversion Procedures and Application to Earthquakes in the Central Alps Region, *JGR Solid Earth*, 126, <https://doi.org/10.1029/2021JB022155>, 2021b.
- Diehl, T., Heilig, J., Cauzzi, C., Deichmann, N., Truttmann, S., Herwegh, M., and Wiemer, S.: SECOS24: New insights into seismicity, deformation and crustal stresses in the Central Alps Region from a baseline seismotectonic earthquake catalog, in: 625 EGU 2024, EGU 2024, Vienna, 2024.
- Dietrich, D.: Fold-axis parallel extension in an arcuate fold- and thrust belt: the case of the Helvetic nappes, *Tectonophysics*, 170, 183–212, [https://doi.org/10.1016/0040-1951\(89\)90271-0](https://doi.org/10.1016/0040-1951(89)90271-0), 1989.
- Dietrich, D. and Casey, M.: A new tectonic model for the Helvetic nappes, *SP*, 45, 47–63, <https://doi.org/10.1144/GSL.SP.1989.045.01.03>, 1989.
- 630 Egli, D. and Mancktelow, N.: The structural history of the Mont Blanc massif with regard to models for its recent exhumation, *Swiss J Geosci*, 106, 469–489, <https://doi.org/10.1007/s00015-013-0153-5>, 2013.
- Egli, D., Mancktelow, N., and Spikings, R.: Constraints from  $^{40}\text{Ar}/^{39}\text{Ar}$  geochronology on the timing of Alpine shear zones in the Mont Blanc-Aiguilles Rouges region of the European Alps: GEOCHRONOLOGY OF ALPINE SHEAR ZONES, *Tectonics*, 36, 730–748, <https://doi.org/10.1002/2016TC004450>, 2017.
- 635 Escher, A., Masson, H., and Steck, A.: Nappe geometry in the Western Swiss Alps, *Journal of Structural Geology*, 15, 501–509, [https://doi.org/10.1016/0191-8141\(93\)90144-Y](https://doi.org/10.1016/0191-8141(93)90144-Y), 1993.





- Fox, M., Herman, F., Kissling, E., and Willett, S. D.: Rapid exhumation in the Western Alps driven by slab detachment and glacial erosion, *Geology*, 43, 379–382, <https://doi.org/10.1130/G36411.1>, 2015.
- 640 Fréchet, J., Thouvenot, F., Frogneux, M., Deichmann, N., and Cara, M.: The MW 4.5 Vallorcine (French Alps) earthquake of 8 September 2005 and its complex aftershock sequence, *J Seismol*, 15, 43–58, <https://doi.org/10.1007/s10950-010-9205-8>, 2011.
- Gasser, D. and Mancktelow, N. S.: Brittle faulting in the Rawil depression: field observations from the Rezli fault zones, Helvetic nappes, Western Switzerland, *Swiss J Geosci*, 103, 15–32, <https://doi.org/10.1007/s00015-010-0004-6>, 2010.
- 645 Glotzbach, C., Reinecker, J., Danišik, M., Rahn, M., Frisch, W., and Spiegel, C.: Thermal history of the central Gotthard and Aar massifs, European Alps: Evidence for steady state, long-term exhumation, *Journal of Geophysical Research: Earth Surface*, 115, <https://doi.org/10.1029/2009JF001304>, 2010.
- Goebel, T. H. W., Kwiatek, G., Becker, T. W., Brodsky, E. E., and Dresen, G.: What allows seismic events to grow big?: Insights from b-value and fault roughness analysis in laboratory stick-slip experiments, *Geology*, 45, 815–818, <https://doi.org/10.1130/G39147.1>, 2017.
- 650 Goertz-Allmann, B. P., Edwards, B., Bethmann, F., Deichmann, N., Clinton, J., Fah, D., and Giardini, D.: A New Empirical Magnitude Scaling Relation for Switzerland, *Bulletin of the Seismological Society of America*, 101, 3088–3095, <https://doi.org/10.1785/0120100291>, 2011.
- Goldstein, M. L., Morris, S. A., and Yen, G. G.: Problems with fitting to the power-law distribution, *The European Physical Journal B*, 41, 255–258, 2004.
- 655 Gulia, L. and Wiemer, S.: The influence of tectonic regimes on the earthquake size distribution: A case study for Italy: STRESS REGIMES AND b-VALUE, *Geophys. Res. Lett.*, 37, n/a-n/a, <https://doi.org/10.1029/2010GL043066>, 2010.
- Gutenberg, B. and Richter, C. F.: Frequency of Earthquakes in California, *Bulletin of the Seismological Society of America*, 34, 185–188, 1944.
- 660 Hatton, C. G., Main, I. G., and Meredith, P. G.: A comparison of seismic and structural measurements of scaling exponents during tensile subcritical crack growth, *Journal of Structural Geology*, 15, 1485–1495, 1993.
- Häuselmann, P., Granger, D. E., Jeannin, P.-Y., and Lauritzen, S.-E.: Abrupt glacial valley incision at 0.8 Ma dated from cave deposits in Switzerland, *Geol*, 35, 143, <https://doi.org/10.1130/G23094A>, 2007.
- Heffer, K. J. and Bevan, T. G.: *Scaling Relationships in Natural Fractures: Data, Theory, and Application*, Society of Petroleum engineers, <https://doi.org/10.2118/20981-MS>, 1990.
- 665 Hentschel, H. G. E. and Procaccia, I.: The infinite number of generalized dimensions of fractals and strange attractors, *Physica D: Nonlinear Phenomena*, 8, 435–444, [https://doi.org/10.1016/0167-2789\(83\)90235-X](https://doi.org/10.1016/0167-2789(83)90235-X), 1983.
- Herwegh, M., Berger, A., Glotzbach, C., Wangenheim, C., Mock, S., Wehrens, P., Baumberger, R., Egli, D., and Kissling, E.: Late stages of continent-continent collision: Timing, kinematic evolution, and exhumation of the Northern rim (Aar Massif) of the Alps, *Earth-Science Reviews*, 200, 102959, <https://doi.org/10.1016/j.earscirev.2019.102959>, 2020.
- 670 Herwegh, M., Berger, A., Bellashen, N., Rolland, Y., and Kissling, E.: Evolution of the External Crystalline Massifs of the European Alps: From Massif to Lithosphere Scale, in: *Geodynamics of the Alps*, ISTE-Wiley, London, 2023.

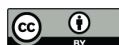

- Hetényi, G., Epard, J.-L., Colavitti, L., Hirzel, A. H., Kiss, D., Petri, B., Scarponi, M., Schmalholz, S. M., and Subedi, S.: Spatial relation of surface faults and crustal seismicity: a first comparison in the region of Switzerland, *Acta Geod Geophys*, 53, 439–461, <https://doi.org/10.1007/s40328-018-0229-9>, 2018.
- 675 Huggenberger, P. and Aebli, H.: Bruchtektonik und Blattverschiebungen im Gebiet des Rawil-Passes : Resultat einer E-W gerichteten dextralen Scherbewegung im kristallinen Untergrund?, *Schweizerische Mineralogische und Petrographische Mitteilungen*, <https://doi.org/10.5169/SEALS-52783>, 1989.
- Jimenez, M.-J. and Pavoni, N.: Focal mechanisms of recent earthquakes, 1976-1982, and seismotectonics in Switzerland, in: *Proc. Sess. 12, IASPEI XVIII Assembly, Hamburg 1983*, 77–84, 1983.
- 680 Kastrup, U., Zoback, M. L., Deichmann, N., Evans, K. F., Giardini, D., and Michael, A. J.: Stress field variations in the Swiss Alps and the northern Alpine foreland derived from inversion of fault plane solutions, *J. Geophys. Res.*, 109, <https://doi.org/10.1029/2003JB002550>, 2004.
- Knott, S. D., Beach, A., Brockbank, P. J., Lawson Brown, J., McCallum, J. E., and Welbon, A. I.: Spatial and mechanical controls on normal fault populations, *Journal of Structural Geology*, 18, 359–372, [https://doi.org/10.1016/S0191-8141\(96\)80056-3](https://doi.org/10.1016/S0191-8141(96)80056-3), 1996.
- 685 Lee, T., Diehl, T., Kissling, E., and Wiemer, S.: New insights into the Rhône–Simplon fault system (Swiss Alps) from a consistent earthquake catalogue covering 35 yr, *Geophysical Journal International*, 232, 1568–1589, <https://doi.org/10.1093/gji/ggac407>, 2023.
- Lei, Q., Latham, J.-P., Tsang, C.-F., Xiang, J., and Lang, P.: A new approach to upscaling fracture network models while preserving geostatistical and geomechanical characteristics: A New Fracture Network Upscaling Method, *J. Geophys. Res. Solid Earth*, 120, 4784–4807, <https://doi.org/10.1002/2014JB011736>, 2015.
- 690 Leonard, M.: Self-Consistent Earthquake Fault-Scaling Relations: Update and Extension to Stable Continental Strike-Slip Faults, *Bulletin of the Seismological Society of America*, 104, 2953–2965, <https://doi.org/10.1785/0120140087>, 2014.
- Levato, L., Sellami, S., Epard, J.-L., Pruniaux, B., Olivier, R., Wagner, J.-J., and Masson, H.: The cover-basement contact beneath the Rawil axial depression (western Alps): True amplitude seismic processing, petrophysical properties, and modelling, *Tectonophysics*, 232, 391–409, [https://doi.org/10.1016/0040-1951\(94\)90099-X](https://doi.org/10.1016/0040-1951(94)90099-X), 1994.
- 695 Line, C. E. R., Snyder, D. B., and Hobbs, R. W.: The sampling of fault populations in dolerite sills of Central Sweden and implications for resolution of seismic data, *Journal of Structural Geology*, 19, 687–701, [https://doi.org/10.1016/S0191-8141\(96\)00087-9](https://doi.org/10.1016/S0191-8141(96)00087-9), 1997.
- 700 Mancktelow, N.: The Simplon Line : a major displacement zone in the western Lepontine Alps, *Eclogae Geologicae Helvetiae*, 78, 73–96, <https://doi.org/10.5169/SEALS-165644>, 1985.
- Manighetti, I., Campillo, M., Bouley, S., and Cotton, F.: Earthquake scaling, fault segmentation, and structural maturity, *Earth and Planetary Science Letters*, 253, 429–438, <https://doi.org/10.1016/j.epsl.2006.11.004>, 2007.
- Marrett, R., Ortega, O. J., and Kelsey, C. M.: Extent of power-law scaling for natural fractures in rock, *Geol*, 27, 799, [https://doi.org/10.1130/0091-7613\(1999\)027<0799:EOPLSF>2.3.CO;2](https://doi.org/10.1130/0091-7613(1999)027<0799:EOPLSF>2.3.CO;2), 1999.
- 705 Maurer, H.: Seismotectonics and upper crustal structure in the western Swiss Alps, Dissertation, ETH Zürich, 1993.



- Maurer, H. and Deichmann, N.: Microearthquake cluster detection based on waveform similarities, with an application to the western Swiss Alps, *Geophysical Journal International*, 123, 588–600, <https://doi.org/10.1111/j.1365-246X.1995.tb06873.x>, 1995.
- 710 Maurer, H. R., Burkhard, M., Deichmann, N., and Green, A. G.: Active tectonism in the central Alps: contrasting stress regimes north and south of the Rhone Valley, *Terra Nova*, 9, 91–94, <https://doi.org/10.1111/j.1365-3121.1997.tb00010.x>, 1997.
- Mogi, K.: Study of Elastic Shocks Caused by the Fracture of Heterogeneous Materials and its Relations to Earthquake Phenomena, *Bulletin of the Earthquake Research Institute*, 40, 125–173, 1962.
- Mori, J. and Abercrombie, R. E.: Depth dependence of earthquake frequency-magnitude distributions in California: Implications for rupture initiation, *J. Geophys. Res.*, 102, 15081–15090, <https://doi.org/10.1029/97JB01356>, 1997.
- 715 Musso Piantelli, F., Mair, D., Berger, A., Schlunegger, F., Wiederkehr, M., Kurmann, E., Baumberger, R., Möri, A., and Herwegh, M.: 4D reconstruction of the Doldenhorn nappe-basement system in the Aar massif: Insights into late-stage continent-continent collision in the Swiss Alps, *Tectonophysics*, 843, 229586, <https://doi.org/10.1016/j.tecto.2022.229586>, 2022.
- 720 Nicol, A., Walsh, J. J., Watterson, J., and Gillespie, P.: Fault size distributions - are they really power-law?, *Journal of Structural Geology*, 18, 191–197, 1996.
- Odling, N. E.: Scaling and connectivity of joint systems in sandstones from western Norway, *Journal of Structural Geology*, 19, 1257–1271, [https://doi.org/10.1016/S0191-8141\(97\)00041-2](https://doi.org/10.1016/S0191-8141(97)00041-2), 1997.
- 725 Odling, N. E., Gillespie, P., Bourguine, B., Castaing, C., Chiles, J.-P., Christensen, N. P., Fillion, E., Genter, A., Olsen, C., Thrane, L., Trice, R., Aarseth, E., Walsh, J. J., and Watterson, J.: Variations in fracture system geometry and their implications for fluid flow in fractured hydrocarbon reservoirs, *Petroleum Geoscience*, 5, 373–384, 1999.
- O’Leary, D. W., Friedman, J. D., and Pohn, H. A.: Lineament, linear, lineation: Some proposed new standards for old terms, *Geol Soc America Bull*, 87, 1463, [https://doi.org/10.1130/0016-7606\(1976\)87<1463:LLLSPN>2.0.CO;2](https://doi.org/10.1130/0016-7606(1976)87<1463:LLLSPN>2.0.CO;2), 1976.
- 730 Ouillon, G., Castaing, C., and Sornette, D.: Hierarchical geometry of faulting, *J. Geophys. Res.*, 101, 5477–5487, <https://doi.org/10.1029/95JB02242>, 1996.
- Pavoni, N.: Comparison of focal mechanisms of earthquakes and faulting in the Helvetic zone of the Central Valais, Swiss Alps, *Eclogae Geologicae Helvetiae*, 73, <https://doi.org/10.5169/SEALS-164973>, 1980a.
- Pavoni, N.: Crustal Stresses Inferred from Fault-Plane Solutions of Earthquakes and Neotectonic Deformation in Switzerland, in: *Tectonic Stresses in the Alpine-Mediterranean Region*, vol. 9, edited by: Scheidegger, A. E., Springer Vienna, Vienna, 63–68, [https://doi.org/10.1007/978-3-7091-8588-9\\_8](https://doi.org/10.1007/978-3-7091-8588-9_8), 1980b.
- 735 Pavoni, N. and Mayer-Rosa, D.: Seismotektonische Karte der Schweiz 1:750000, *Eclogae Geologicae Helvetiae*, 71, <https://doi.org/10.5169/SEALS-164732>, 1978.
- Pavoni, N., Maurer, H., Roth, P., and Deichmann, N.: Seismicity and seismotectonics of the Swiss Alps, Birkhauser, Basel, 1997.
- 740 Petruccioli, A., Schorlemmer, D., Tormann, T., Rinaldi, A. P., Wiemer, S., Gasperini, P., and Vannucci, G.: The influence of faulting style on the size-distribution of global earthquakes, *Earth and Planetary Science Letters*, 527, 115791, <https://doi.org/10.1016/j.epsl.2019.115791>, 2019a.



- Petrucelli, A., Gasperini, P., Tormann, T., Schorlemmer, D., Rinaldi, A. P., Vannucci, G., and Wiemer, S.: Simultaneous dependence of the earthquake-size distribution on faulting style and depth, *Geophysical Research Letters*, 46, 745 <https://doi.org/10.1029/2019GL083997>, 2019b.
- Pfiffner, O. A.: The structure of the Helvetic nappes and its relation to the mechanical stratigraphy, *Journal of Structural Geology*, 15, 511–521, 1993.
- Pfiffner, O. A., Sahli, S., and Stäubli, M.: Structure and evolution of the external basement massifs (Aar, Aiguilles-Rouges/Mt.Bland)., *Deep Structure of the Alps, results of NRP20*, 1997.
- 750 Pickering, G., Bull, J. M., and Sanderson, D. J.: Sampling power-law distributions, *Tectonophysics*, 248, 1–20, 1995.
- Piña-Valdés, J., Socquet, A., Beauval, C., Doin, M., D’Agostino, N., and Shen, Z.: 3D GNSS Velocity Field Sheds Light on the Deformation Mechanisms in Europe: Effects of the Vertical Crustal Motion on the Distribution of Seismicity, *JGR Solid Earth*, 127, e2021JB023451, <https://doi.org/10.1029/2021JB023451>, 2022.
- Ramsay, J. G.: *Tectonics of the Helvetic Nappes, Thrust and Nappe Tectonics*, 1981.
- 755 Ramsay, J. G.: Fold and fault geometry in the western Helvetic nappes of Switzerland and France and its implication for the evolution of the arc of the western Alps, *SP*, 45, 33–45, <https://doi.org/10.1144/GSL.SP.1989.045.01.02>, 1989.
- Schlische, R. W., Young, S. S., Ackermann, R. V., and Gupta, A.: Geometry and scaling relations of a population of very small rift-related normal faults, *Geol*, 24, 683, [https://doi.org/10.1130/0091-7613\(1996\)024<0683:GASROA>2.3.CO;2](https://doi.org/10.1130/0091-7613(1996)024<0683:GASROA>2.3.CO;2), 1996.
- Scholz, C. H.: The frequency-magnitude relation of microfracturing in rock and its relation to earthquakes, *Bulletin of the Seismological Society of America*, 58, 399–415, 1968.
- 760 Scholz, C. H.: Size Distributions for Large and Small Earthquakes, *Bulletin of the Seismological Society of America*, 87, 1074–1077, 1997.
- Scholz, C. H.: A further note on earthquake size distributions, *Bulletin of the Seismological Society of America*, 88, 1325–1326, 1998.
- 765 Scholz, C. H.: *Fault Mechanics*, in: *Treatise on Geophysics*, Elsevier B.V., 441–483, 2007.
- Scholz, C. H.: On the stress dependence of the earthquake *b* value, *Geophys. Res. Lett.*, 42, 1399–1402, <https://doi.org/10.1002/2014GL062863>, 2015.
- Scholz, C. H.: *The Mechanics of Earthquakes and Faulting*, 3rd ed., Cambridge University Press, <https://doi.org/10.1017/9781316681473>, 2019.
- 770 Scholz, C. H., Dawers, N. H., Yu, J.-Z., Anders, M. H., and Cowie, P. A.: Fault growth and fault scaling laws: Preliminary results, *J. Geophys. Res.*, 98, 21951–21961, <https://doi.org/10.1029/93JB01008>, 1993.
- Schorlemmer, D., Wiemer, S., and Wyss, M.: Variations in earthquake-size distribution across different stress regimes, *Nature*, 437, 539–542, <https://doi.org/10.1038/nature04094>, 2005.
- 775 Spada, M., Tormann, T., Wiemer, S., and Enescu, B.: Generic dependence of the frequency-size distribution of earthquakes on depth and its relation to the strength profile of the crust: THE *B* -VALUES WITH DEPTH, *Geophys. Res. Lett.*, 40, 709–714, <https://doi.org/10.1029/2012GL054198>, 2013.



- Staudenmaier, N., Cauzzi, C., and Wiemer, S.: Magnitude Scaling Relationships in Parkfield and Switzerland and their relevance for PSHA, Swiss Seismological Service (SED) at ETH Zurich, 2018.
- 780 Steck, A., Epard, J.-L., Escher, A., Lehner, P., Marchant, R., and Masson, H.: Geological interpretation of the seismic of the seismic profiles through Western Switzerland: Rawil (W1), Val d'Anniviers (W2), Mattertal (W3), Zmutt-Zermatt-Findelen (W4) and Val de Bagnes (W5)., Deep Structure of the Alps, results of NRP20, 1997.
- 785 Sternai, P., Sue, C., Husson, L., Serpelloni, E., Becker, T. W., Willett, S. D., Faccenna, C., Di Giulio, A., Spada, G., Jolivet, L., Valla, P., Petit, C., Nocquet, J.-M., Walpersdorf, A., and Castelltort, S.: Present-day uplift of the European Alps: Evaluating mechanisms and models of their relative contributions, *Earth-Science Reviews*, 190, 589–604, <https://doi.org/10.1016/j.earscirev.2019.01.005>, 2019.
- Thingbaijam, K. K. S., Martin Mai, P., and Goda, K.: New Empirical Earthquake Source-Scaling Laws, *Bulletin of the Seismological Society of America*, 107, 2225–2246, <https://doi.org/10.1785/0120170017>, 2017.
- Torabi, A. and Berg, S. S.: Scaling of fault attributes: A review, *Marine and Petroleum Geology*, 28, 1444–1460, <https://doi.org/10.1016/j.marpetgeo.2011.04.003>, 2011.
- 790 Tormann, T., Wiemer, S., and Mignan, A.: Systematic survey of high-resolution b value imaging along Californian faults: Inference on asperities, *Journal of Geophysical Research: Solid Earth*, 119, 2029–2054, <https://doi.org/10.1002/2013JB010867>, 2014.
- Truttmann, S., Diehl, T., and Herwegh, M.: Hypocenter-Based 3D Imaging of Active Faults: Method and Applications in the Southwestern Swiss Alps, *JGR Solid Earth*, 128, e2023JB026352, <https://doi.org/10.1029/2023JB026352>, 2023.
- 795 Truttmann, S., Diehl, T., Herwegh, M., and Wiemer, S.: The Size Distributions of Faults and Earthquakes: Implications for Orogen-Internal Seismogenic Deformation [Dataset], <https://zenodo.org/records/13829055>, 2024.
- Turcotte, D. L.: Fractals in geology and geophysics, *PAGEOPH*, 131, 1989.
- Turcotte, D. L.: Fractals and Chaos in Geology and Geophysics, 2nd ed., Cambridge University Press, <https://doi.org/10.1017/CBO9781139174695>, 1997.
- 800 Ustaszewski, M. and Pfiffner, O. A.: Neotectonic faulting, uplift and seismicity in the central and western Swiss Alps, *SP*, 298, 231–249, <https://doi.org/10.1144/SP298.12>, 2008.
- Ustaszewski, M., Herwegh, M., McClymont, A. F., Pfiffner, O. A., Pickering, R., and Preusser, F.: Unravelling the evolution of an Alpine to post-glacially active fault in the Swiss Alps, *Journal of Structural Geology*, 29, 1943–1959, <https://doi.org/10.1016/j.jsg.2007.09.006>, 2007.
- 805 Valla, P. G., van der Beek, P. A., Shuster, D. L., Braun, J., Herman, F., Tassan-Got, L., and Gautheron, C.: Late Neogene exhumation and relief development of the Aar and Aiguilles Rouges massifs (Swiss Alps) from low-temperature thermochronology modeling and 4He/3He thermochronometry, *Journal of Geophysical Research: Earth Surface*, 117, <https://doi.org/10.1029/2011JF002043>, 2012.
- Vicsek, T.: Fractal growth phenomena, World scientific, 1992.
- 810 Wehrens, P., Berger, A., Peters, M., Spillmann, T., and Herwegh, M.: Deformation at the frictional-viscous transition: Evidence for cycles of fluid-assisted embrittlement and ductile deformation in the granitoid crust, *Tectonophysics*, 693, 66–84, <https://doi.org/10.1016/j.tecto.2016.10.022>, 2016.



- Wells, D. L. and Coppersmith, K. J.: New Empirical Relationships among Magnitude, Rupture Length, Rupture Width, Rupture Area, and Surface Displacement, *Bulletin of the Seismological Society of America*, 84, 974–1002, 1994.
- 815 Wiemer, S., Danciu, L., Edwards, B., Marti, M., Fäh, D., Hiemer, S., Woessner, J., Cauzzi, C., Kästli, P., and Kremer, K.: Seismic Hazard Model 2015 for Switzerland (SUIhaz2015), Swiss Seismological Service (SED) at ETH Zurich, 2016.
- Yielding, G., Walsh, J. J., and Watterson, J.: The prediction of small scale faulting in reservoirs, *First Break*, 10, 449–460, 1992.
- 820 Yielding, G., Needham, T., and Jones, H.: Sampling of fault populations using sub-surface data: a review, *Journal of Structural Geology*, 18, 135–146, [https://doi.org/10.1016/S0191-8141\(96\)80039-3](https://doi.org/10.1016/S0191-8141(96)80039-3), 1996.
- Zeeb, C., Gomez-Rivas, E., Bons, P. D., and Blum, P.: Evaluation of sampling methods for fracture network characterization using outcrops, *Bulletin*, 97, 1545–1566, <https://doi.org/10.1306/02131312042>, 2013.



825

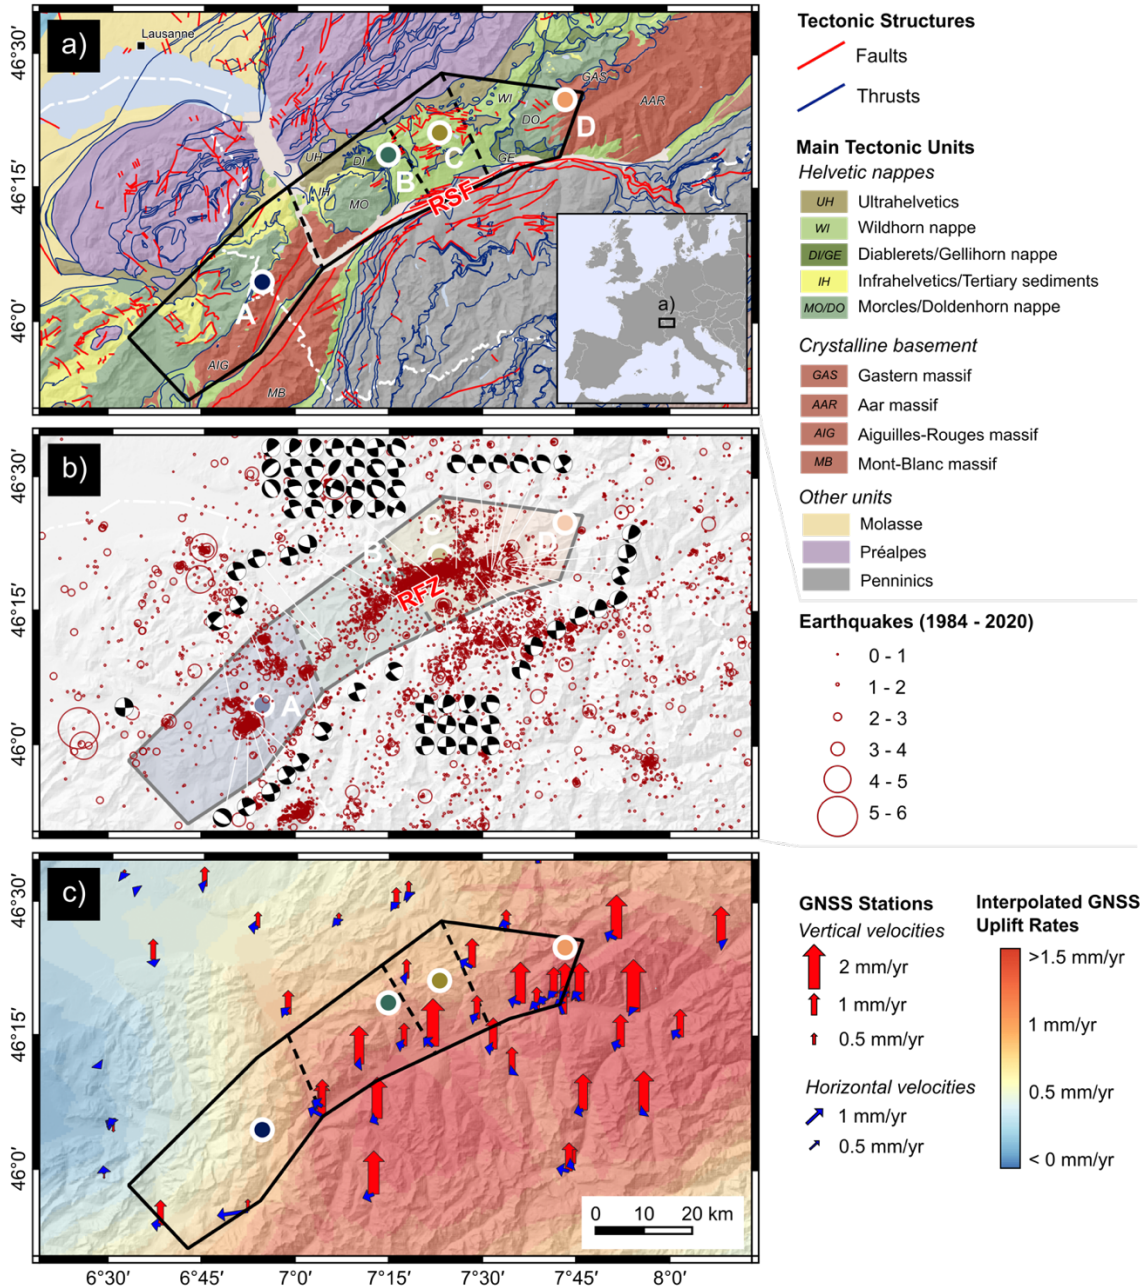

Figure 1: Regional setting of the investigated seismotectonic domain z21 of Wiemer et al. (2016) (black polygon), with the four fault mapping locations (A-D) shown as circles. a) Tectonic map (1:500'000; © swisstopo). RSF: Rhône-Simplon Fault Zone. b) Earthquakes from 1984 to 2020 (Diehl et al. 2021b) and available focal mechanism data (see main text for references). The shaded colors indicate the different subdomains A-D. RFZ: Conceptual Rawil Fault Zone. c) Recent crustal displacement rates based on GNSS surface velocities in the vicinity of the study area with reference to stable Europe (Data: EUREF Permanent GNSS Network (Bruyninx et al., 2019); swisstopo). Digital elevation model: EU-DEM v1.1 (© European Union, Copernicus Land Monitoring Service 2023, European Environment Agency (EEA)).

830



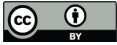

835

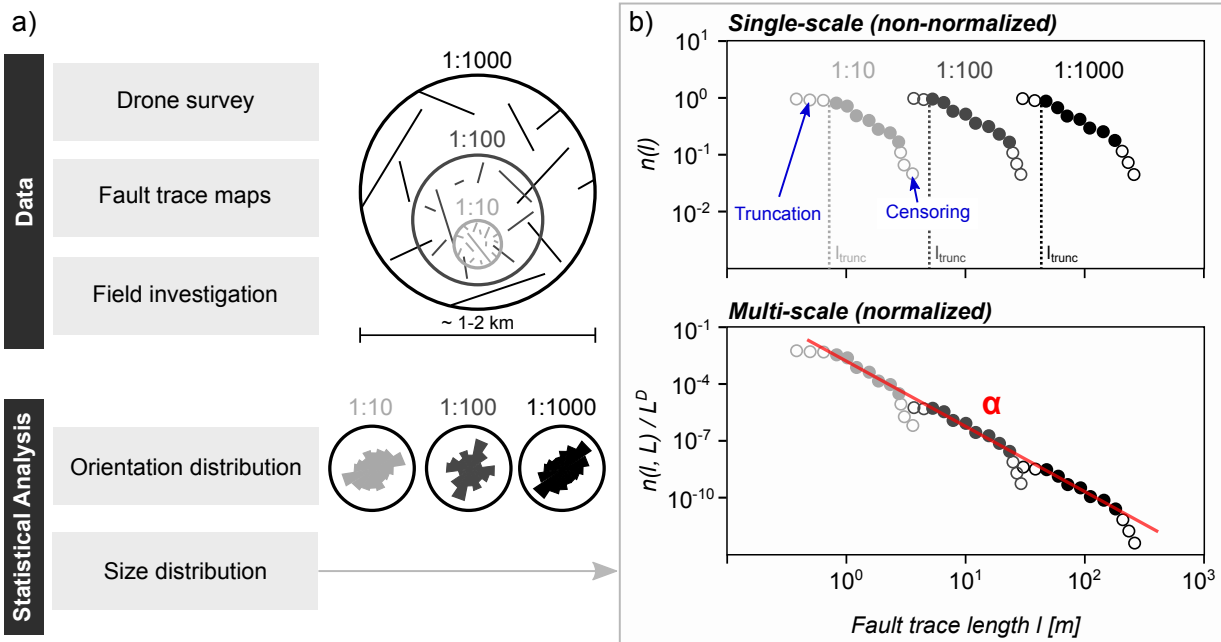

840

Figure 2: a) Workflow of the fault network analysis conducted separately for each location, combining observations from three different mapping scales of 1:1000, 1:100, and 1:10 (for details see Methods). b) Examples of size distributions of the fault networks, plotted with the non-normalized single-scale approach, treating the data from each mapping scale individually (upper panel), and the multi-scale approach, combining all information across scales by normalization with the fractal area (lower panel).

Table 1: Overview of the used orthoimages and digital elevation models (DEM) that serve as a basis for the fault trace maps. Orthoimages and DEM's of the 1:1'000 mapping scale (dm resolution) are publicly available from swisstopo.

| Location | Tectonic Unit    | Mapping Scale | Image Acquisition | UAV Observation Height [m] | Orthoimage Ground Resolution [m] | DEM Ground Resolution [m] | Nr. of mapped fault traces |
|----------|------------------|---------------|-------------------|----------------------------|----------------------------------|---------------------------|----------------------------|
| A        | Aiguilles Rouges | 1:10          | UAV               | 10                         | 0.003                            | 0.006                     | 2'440                      |
|          |                  | 1:100         | UAV               | 70                         | 0.029                            | 0.059                     | 5'826                      |
|          |                  | 1:1'000       | © swisstopo       | -                          | 0.1                              | 2                         | 1'906                      |
| B        | Diablerets       | 1:10          | UAV               | 5                          | 0.001                            | 0.002                     | 2'829                      |
|          |                  | 1:100         | UAV               | 50                         | 0.021                            | 0.041                     | 4'654                      |
|          |                  | 1:1'000       | © swisstopo       | -                          | 0.1                              | 2                         | 3'306                      |
| C        | Wildhorn         | 1:10          | UAV               | 5                          | 0.002                            | 0.005                     | 3'519                      |
|          |                  | 1:100         | UAV               | 70                         | 0.024                            | 0.048                     | 10'894                     |
|          |                  | 1:1'000       | © swisstopo       | -                          | 0.1                              | 2                         | 1'812                      |
| D        | Gastern          | 1:10          | UAV               | 10                         | 0.002                            | 0.005                     | 5'213                      |
|          |                  | 1:100         | UAV               | 60                         | 0.024                            | 0.048                     | 3'214                      |
|          |                  | 1:1'000       | © swisstopo       | -                          | 0.1                              | 2                         | 1'608                      |

845

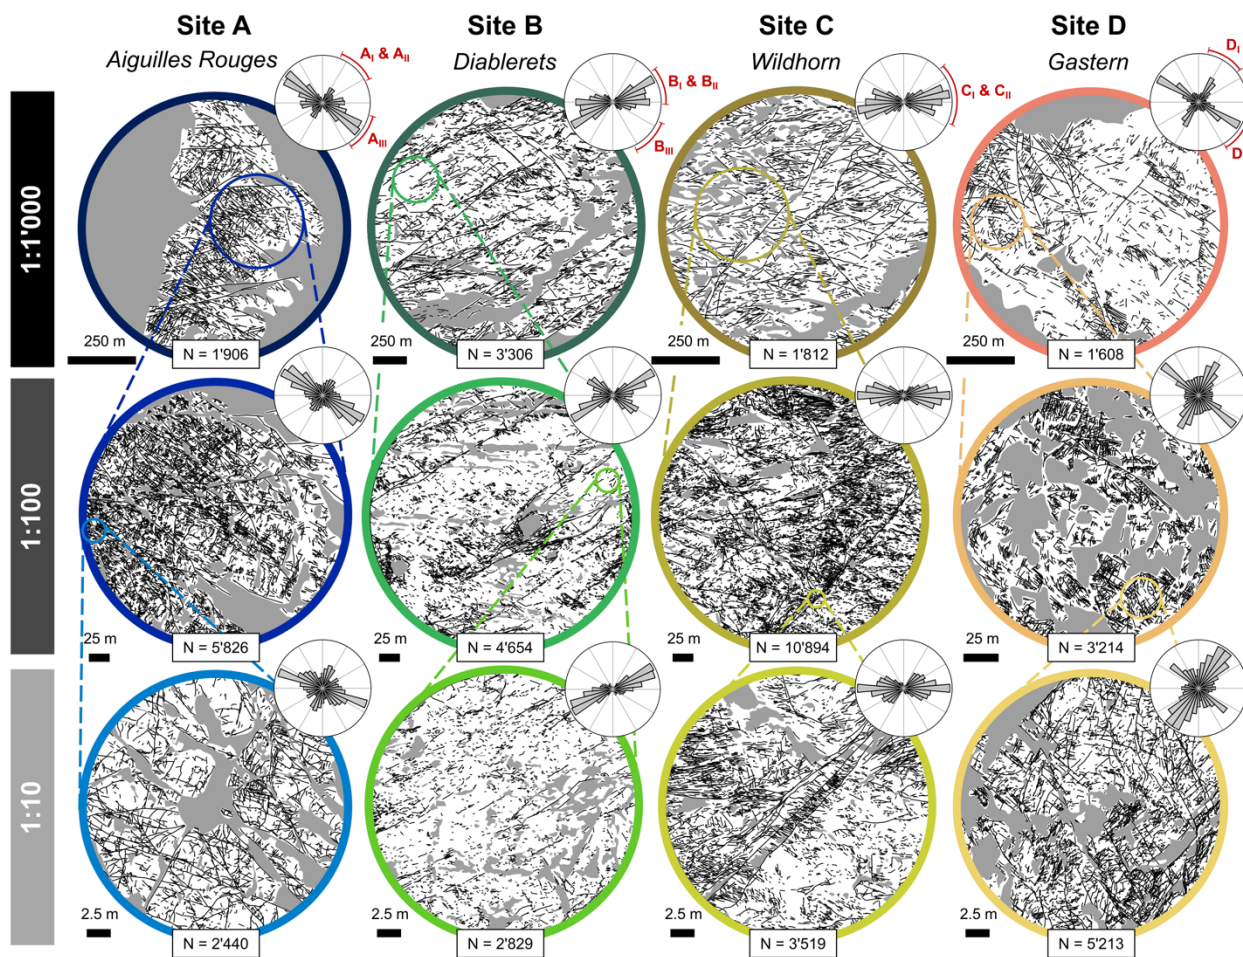

Figure 3: Fault trace maps at different mapping scales (rows) for all four study sites (columns). The maps show both fault traces (black lines) and no data areas (grey areas). The length-weighted rose diagrams to the top right of each map show the 2D orientation distribution of the fault traces. N indicates the number of mapped fault traces.

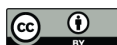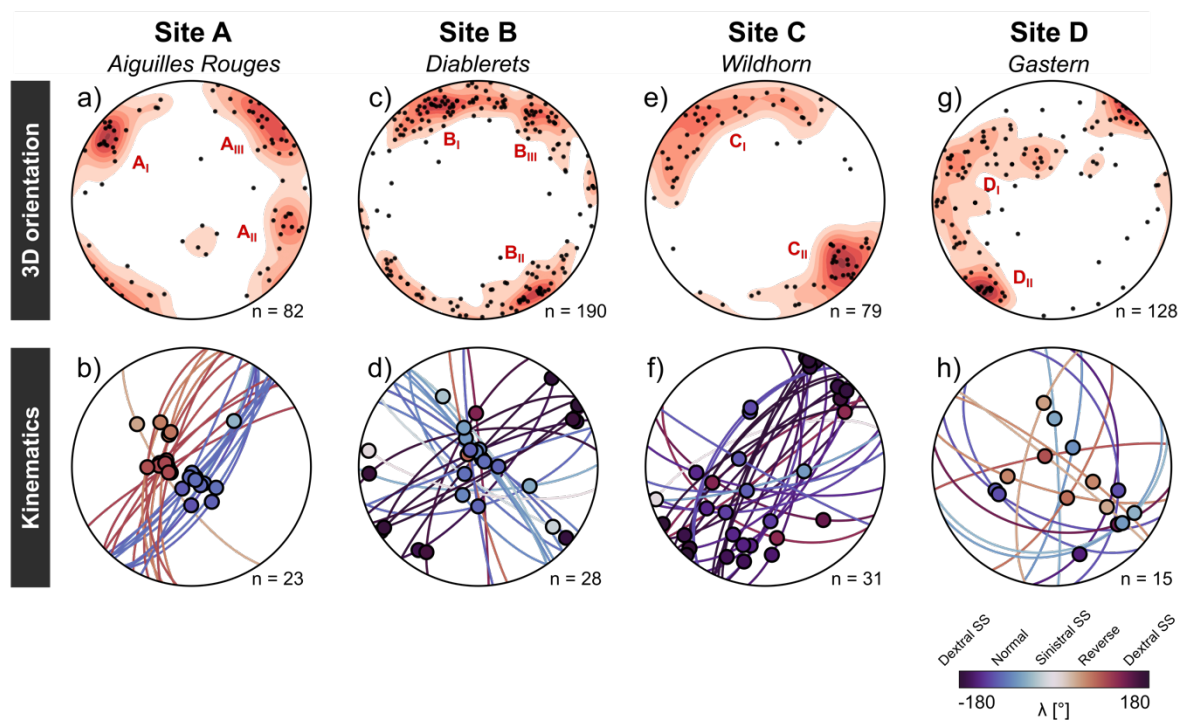

Figure 4: Field-based characterization of the fault populations. The stereoplots in the upper row shows the 3D orientation distributions (black dots: poles to planes on a lower hemisphere projection) with Kamb density contours in red ( $2\sigma$  interval) for all study sites. The lower row shows the respective kinematic indicators from fault observations (lower hemisphere projection). The dots represent the slip vectors, colored after faulting type and shear sense.

855

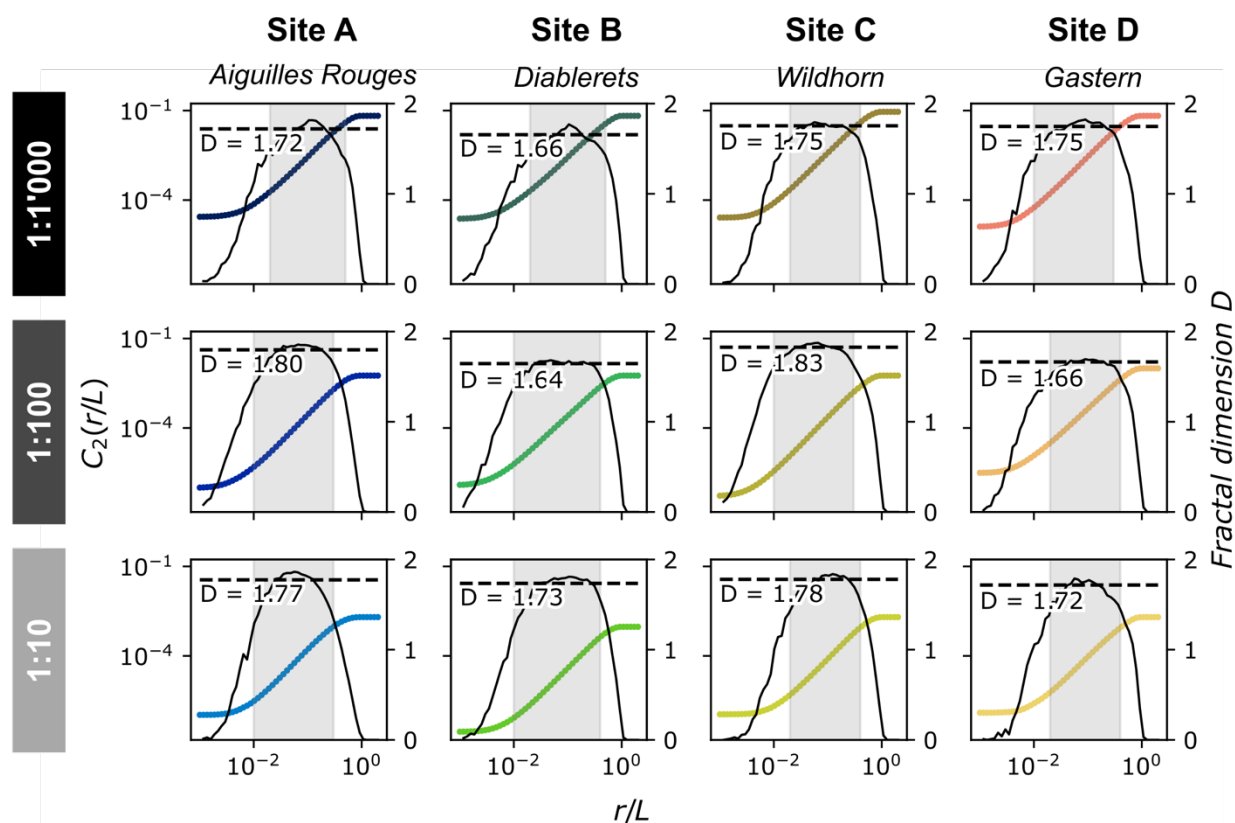

Figure 5: Estimation of the fractal dimension  $D$  for each individual fault network based on the two-point correlation function  $C_2$  (colored line). The black line shows the local slopes of  $C_2$  (derivative of  $C_2$ ; right-hand axis). The plateau in the local slopes within the grey shaded area approximates the fractal dimension  $D$ , which is represented by the black dashed lines.

860

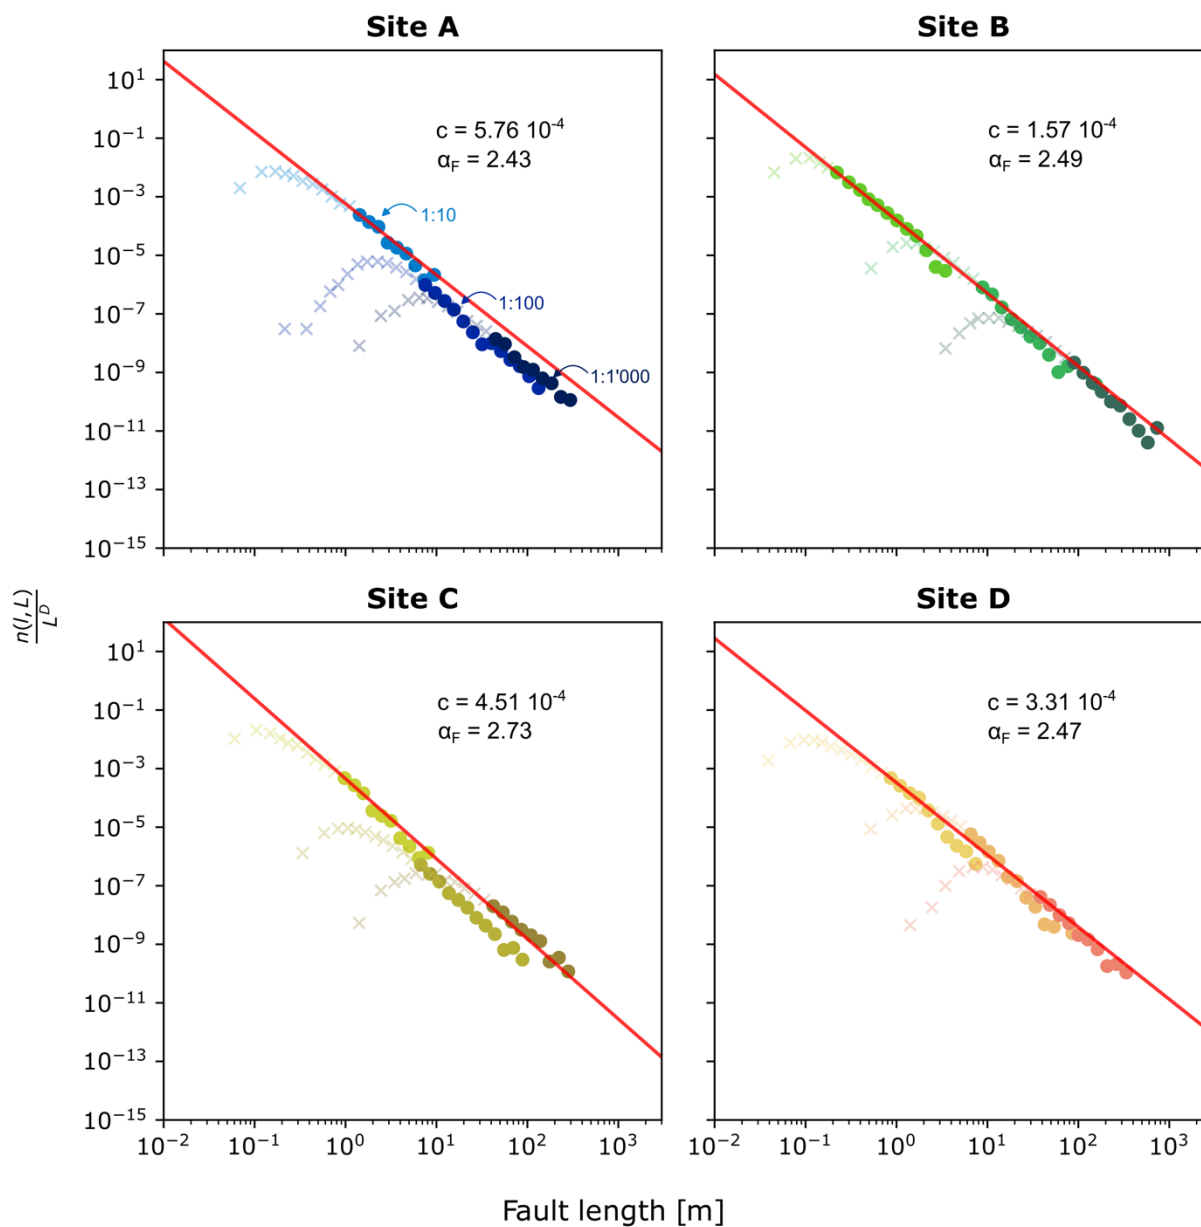

865 **Figure 6: Normalized size distributions of the fault networks for all four study sites, derived from the multi-scale approach. Circles denote the unbiased data, while crosses show the truncated and censored parts of the data. The different color shades represent data from the three mapping scales. The respective fault density term  $c$  and the power law exponent  $\alpha_F$  are given at the top right.**



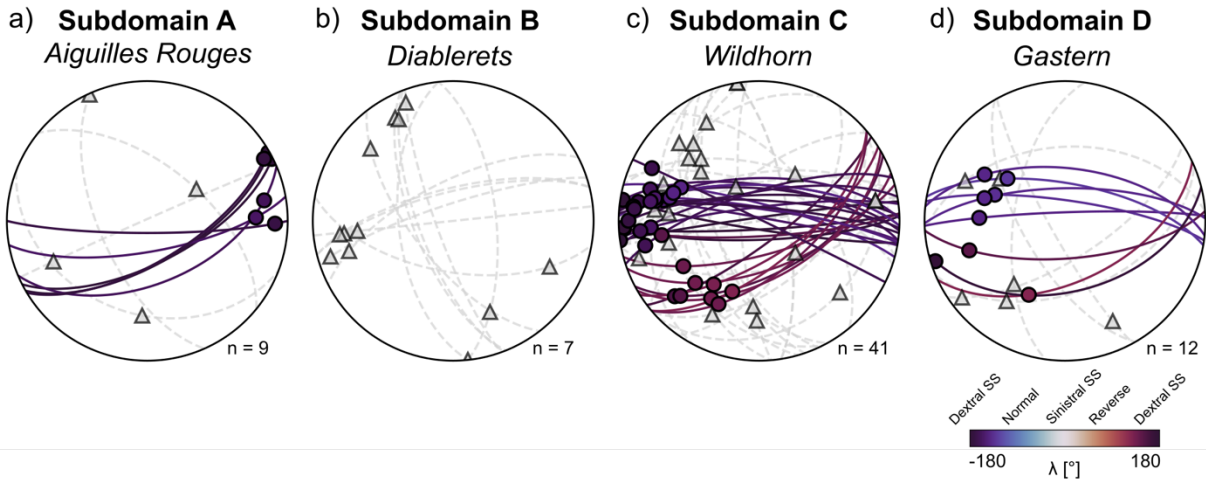

870

Figure 7: 3D orientation distributions of earthquake ruptures based on the nodal planes from published focal mechanism data (see text for references). Solid colored lines: known active nodal planes with slip vectors plotted as circles. Focal mechanisms without a known active nodal plane are represented by grey dashed lines (planes) and triangles (slip vectors). Secondary nodal planes for focal mechanisms with a known active plane are not shown in the figure.

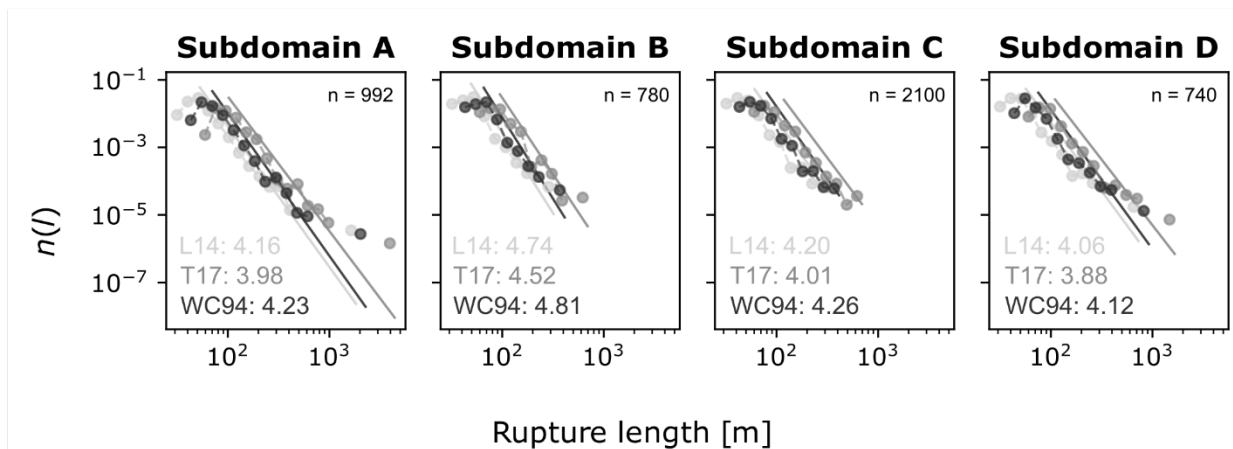

875

Figure 8: 3D size distribution of earthquake ruptures for the four subdomains. The earthquake magnitudes  $M_w$  were converted into rupture lengths  $L_R$  with the scaling laws of Leonard (2014) as L14, Thingbaijam et al. (2017) as T17 and Wells and Coppersmith (1994) as WC94 represented by the different grey scales, yielding three slightly different rupture length distributions and  $\alpha_R$  values. The values in the bottom left indicate the respective values of  $\alpha_R$ .

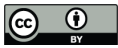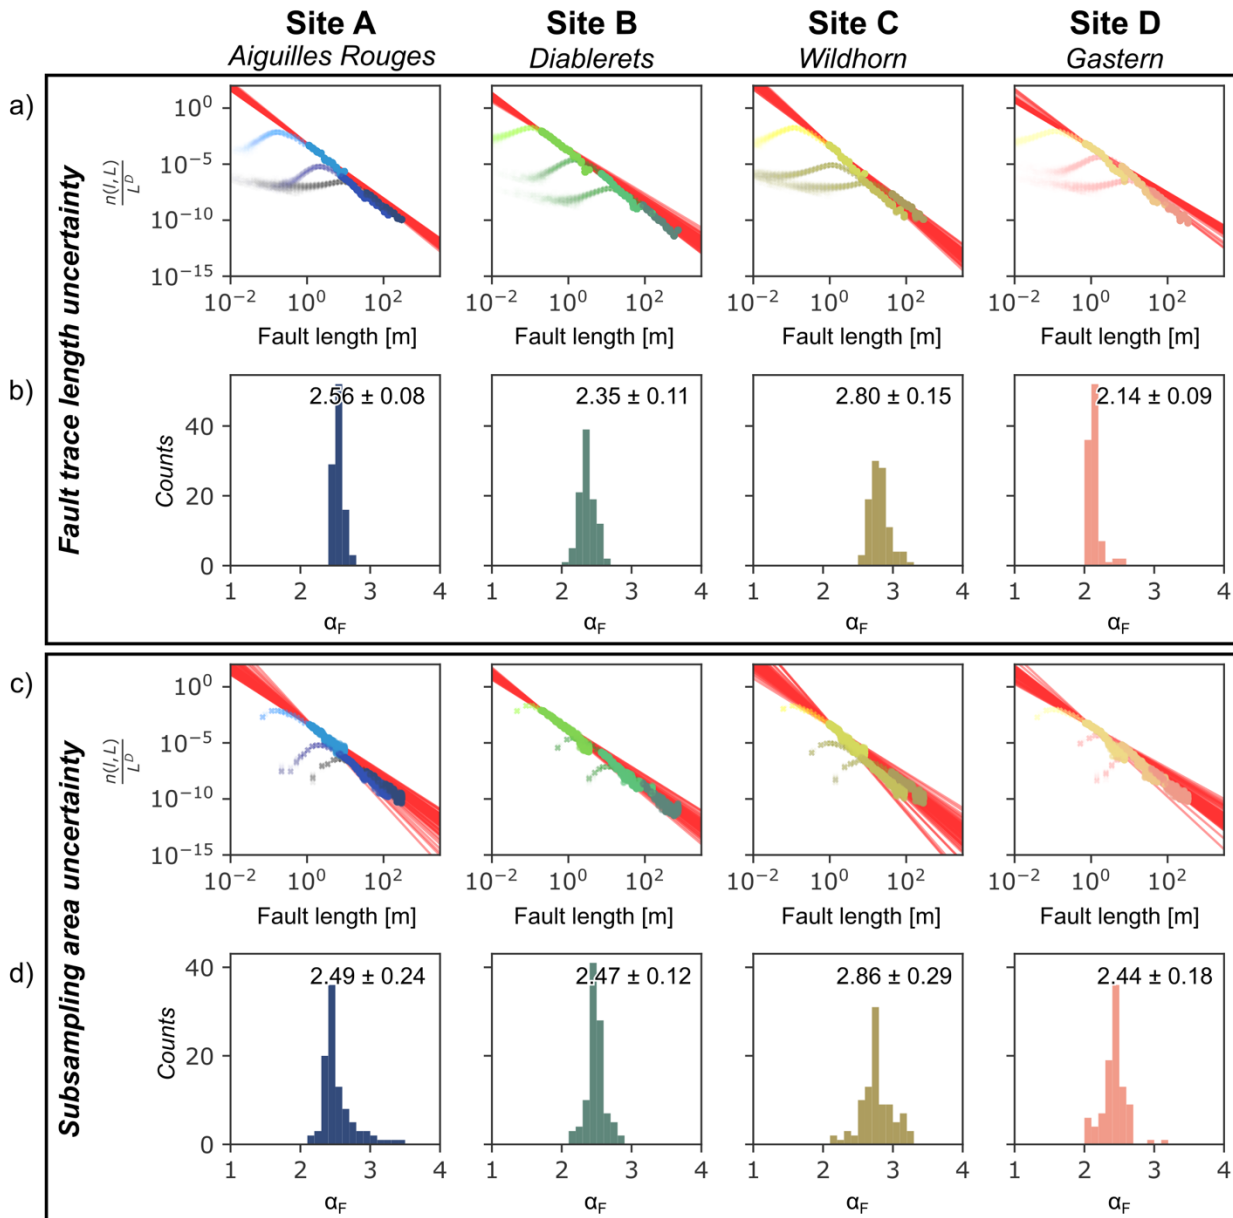

880 **Figure 9:** a) Assessment of the fault trace length uncertainties. The plots show the normalized density length distributions with fault trace lengths perturbed with values 0.05, 0.5, and 5 m, respectively. b) Histogram of the derived  $\alpha_F$  values. The values report the mean  $\alpha_F$  value and the respective standard deviation. c) Assessment of the subsampling area uncertainties, showing the normalized density length distributions with the number of faults in each dataset randomly altered between -25 and +25 %. d) Histogram of the derived  $\alpha_F$  values of the sampling area uncertainties. The values report the mean  $\alpha_F$  value and the respective standard deviation.

885



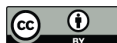

890

**Table 2: Compilation of published power law exponents  $\alpha_F$  from fault size distributions sorted by the used analysis approach (single- vs. multi-scale power law fitting), with complementary information deduced where available. As both cumulative (CDF) and probability density functions (PDF) are used for fitting fault length data, we have to make the CDF-based values comparable to our PDF-based  $\alpha_F$  values by using  $\alpha_{CDF} + 1$  (Bonnet et al., 2001). N: Total number of data;  $\alpha_F$ (published): published power law exponent and the used distribution;  $\alpha_F$ (PDF): power law exponents converted to PDF values (Bonnet et al., 2001); lower and upper limit: approximate bounds of the power law scaling range.**

| Reference                      | N      | Rock type                        | $\alpha_F$ (published) | Distribution | $\alpha_F$ (PDF) | Lower limit [m] | Upper limit [m] |
|--------------------------------|--------|----------------------------------|------------------------|--------------|------------------|-----------------|-----------------|
| <b>Single-scale analysis</b>   |        |                                  |                        |              |                  |                 |                 |
| Ackermann and Schlische (1997) | 873    | Sediments                        | 1.64                   | CDF          | <b>2.64</b>      | 0.04            | 0.15            |
| Bour and Davy (1999)           | 3499   | -                                | 1.88                   | PDF          | <b>1.88</b>      | 4000            | 70000           |
| Clark et al. (1999)            | 1034   | -                                | 1.51                   | CDF          | <b>2.51</b>      | 360             | 4500            |
| Knott et al. (1996)            | 218    | Sediments                        | 1.02                   | CDF          | <b>2.02</b>      | 0.31            | 0.93            |
| Ouillon et al. (1996)          | ...    | Sediments                        | 1.9                    | PDF          | <b>1.9</b>       | 2               | 20              |
| Ouillon et al. (1996)          | ...    | Sediments                        | 2.1                    | PDF          | <b>2.1</b>       | 800             | 8000            |
| Ouillon et al. (1996)          | ...    | Sediments                        | 3.2                    | PDF          | <b>3.2</b>       | 3000            | 20000           |
| Ouillon et al. (1996)          | ...    | Sediments                        | 2.1                    | PDF          | <b>2.1</b>       | 8000            | 30000           |
| Schlische et al. (1996)        | 201    | Sediments                        | 1.4                    | CDF          | <b>2.4</b>       | 3               | 20              |
| Yielding et al. (1996)         | ~450   | -                                | 1.18                   | CDF          | <b>2.18</b>      | 300             | 10000           |
| Yielding et al. (1996)         | ~350   | -                                | 1.75                   | CDF          | <b>2.75</b>      | 4000            | 50000           |
| Yielding et al. (1996)         | 300    | -                                | 1.37                   | CDF          | <b>2.37</b>      | 1500            | 20000           |
| <b>Multi-scale analysis</b>    |        |                                  |                        |              |                  |                 |                 |
| <i>This study: Site A</i>      | 10172  | Crystalline basement             | 2.43                   | PDF          | <b>2.43</b>      | 1               | 300             |
| <i>This study: Site B</i>      | 10789  | Sediments                        | 2.49                   | PDF          | <b>2.49</b>      | 0.1             | 1000            |
| <i>This study: Site C</i>      | 16225  | Sediments                        | 2.73                   | PDF          | <b>2.73</b>      | 0.5             | 300             |
| <i>This study: Site D</i>      | 10035  | Crystalline basement             | 2.47                   | PDF          | <b>2.47</b>      | 0.5             | 400             |
| Bosseenec et al. (2021)        | ...    | Crystalline basement             | 2.03                   | CDF          | <b>3.03</b>      | 1               | 10000           |
| Bour et al. (2002)             | 21'778 | Sediments                        | 2.8                    | PDF          | <b>2.8</b>       | 1               | 200             |
| Castaing et al. (1996)         | ...    | Crystalline basement & sediments | 2.34                   | CDF          | <b>3.34</b>      | 20              | 10000           |
| Ceccato et al. (2022)          | 5908   | Crystalline basement             | 1.88                   | CDF          | <b>2.88</b>      | 1               | 10000           |
| Line et al. (1997)             | ...    | Crystalline basement             | 1.66                   | CDF          | <b>2.66</b>      | 30              | 100000          |
| Odling (1997)                  | ...    | Sediments                        | 2.1                    | CDF          | <b>3.1</b>       | 1               | 1000            |
| Odling et al. (1999)           | ...    | Sediments                        | 2.34                   | CDF          | <b>3.34</b>      | 5               | 100000          |
| Scholz et al. (1993)           | ...    | Volcanic                         | 1.3                    | CDF          | <b>2.3</b>       | 30              | 3000            |
| Yielding et al. (1992)         | ...    | -                                | 2                      | CDF          | <b>3</b>         | 3000            | 30000           |

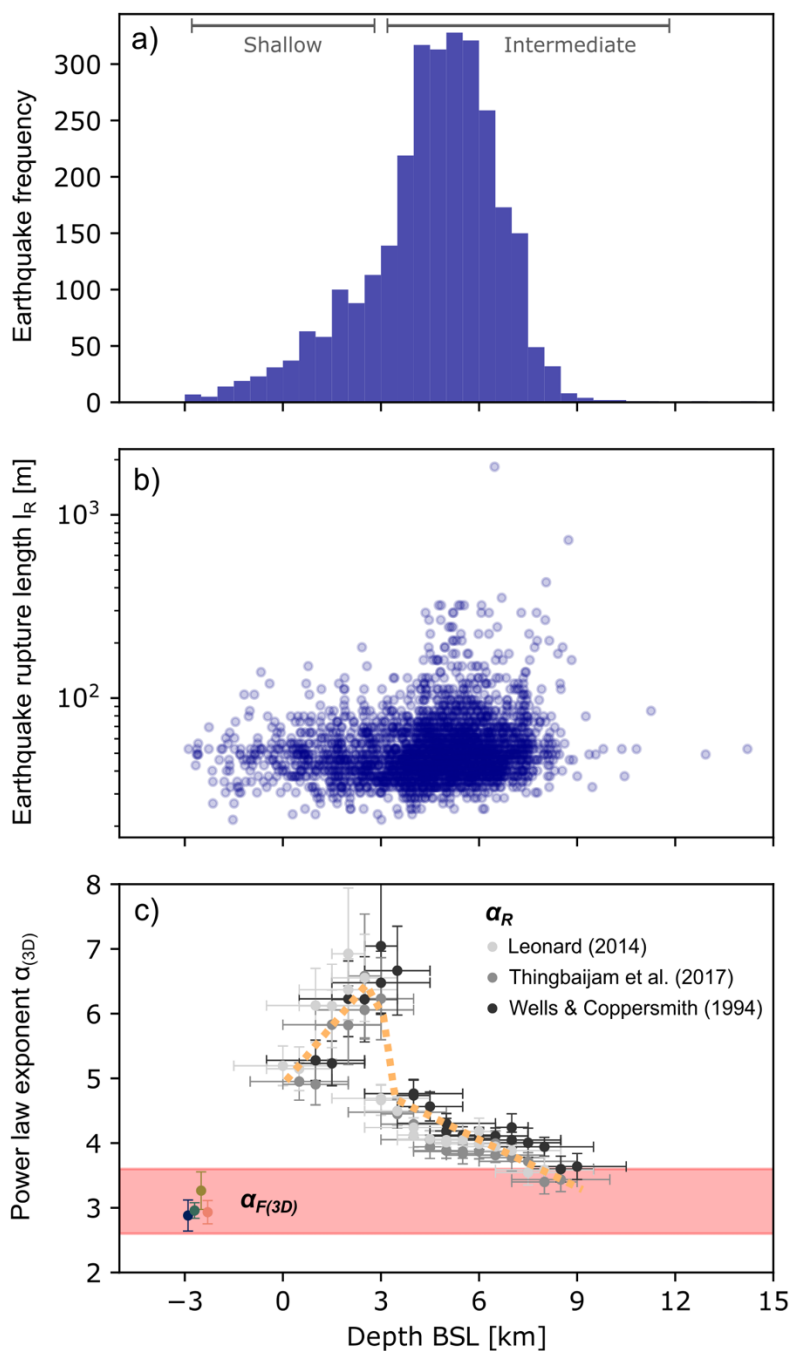

895

**Figure 10: Depth-dependency of the seismicity in terms of a) the number of earthquakes, b) the rupture length  $l_R$  of the individual earthquakes, and c) the derived power law exponents  $\alpha_{(3D)}$  for both the earthquake ruptures (grayscales) and the fault networks (colored bars and red box). Error bars denote  $1\sigma$  uncertainties of the power law exponents (vertical bars) and the used depth interval (horizontal bars).**

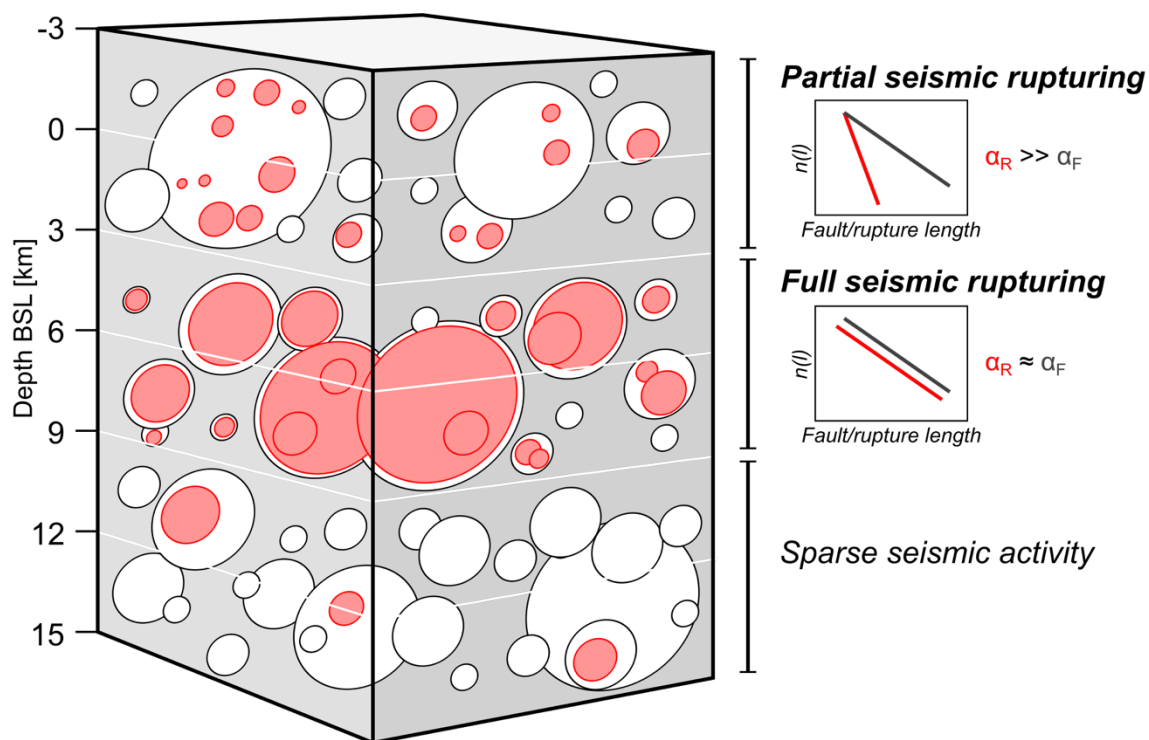

900

**Figure 11: Schematic block diagram to illustrate the depth-dependent seismogenic fault reactivation patterns observed in this study. Full seismogenic fault reactivation seems only to occur at depths from 3 to 9 km below sea level (BSL).**
